# Supplementary material
Source: PubMed Central journal article supplement (PMC4889017)
Supplement: NIHMS785494-supplement-Supplemental_Materials.pdf [file NIHMS785494-supplement-Supplemental_Materials.pdf]

## Supplementary Materials for

### **Rare variant in scavenger receptor BI raises HDL cholesterol and increases risk of coronary heart disease**

Paolo Zanoni, Sumeet A. Khetarpal, Daniel B. Larach, William F. Hancock-Cerutti, John S. Millar, Marina Cuchel, Stephanie DerOhannessian, Anatol Kontush, Praveen Surendran, Danish Saleheen, Stella Trompet, J. Wouter Jukema, Anton De Craen, Panos Deloukas, Naveed Sattar, Ian Ford, Chris Packard, Abdullah al Shafi Majumder, Dewan S. Alam, Emanuele Di Angelantonio, Goncalo Abecasis, Rajiv Chowdhury, Jeanette Erdmann, Børge G. Nordestgaard, Sune F. Nielsen, Anne Tybjærg-Hansen, Ruth Frikke Schmidt, Kari Kuulasmaa, Dajiang J. Liu, Markus Perola, Stefan Blankenberg, Veikko Salomaa, Satu Männistö, Philippe Amouyel, Dominique Arveiler, Jean Ferrieres, Martina Müller-Nurasyid, Marco Ferrario, Frank Kee, Cristen J. Willer, Nilesh Samani, Heribert Schunkert, Adam S. Butterworth, Joanna M. M. Howson, Gina M. Peloso, Nathan O. Stitzel, John Danesh, Sekar Kathiresan, Daniel J. Rader,\* CHD Exome+ Consortium, CARDIoGRAM Exome Consortium, Global Lipids Genetics Consortium

\*Corresponding author. E-mail: rader@mail.med.upenn.edu

Published 11 March 2016, *Science* **351**, 1166 (2016)  
DOI: 10.1126/science.aad3517

#### **This PDF file includes**

Materials and Methods  
Supplementary Text  
Figs. S1 to S7  
Table S1  
Full Reference List  
Consortia and Study Author Lists

## **Acknowledgments and Contributors**

### **Author Contributions to the Research Article:**

P.Z. and S.A.K. performed and analyzed data from cell and animal experiments. S.A.K. and S.D. analyzed results of Penn sequencing and genotyping studies. M.C. and D.B.L. assisted in design and recruitment of subjects for deep clinical phenotyping studies. W.F.H-C. and A.K. performed lipoprotein characterization studies and cholesterol efflux capacity assays. S.A.K. and J.S.M. performed platelet cholesterol measurement assays. P.S. D.S., S.T., J.W.J., A.D.C., P.D., N.S., I.F., C.P. A a.S.M., D.S.A., E.D.A., G.A., R.C., J.E., B.G.N., S.F.N., A.T.H., R.F.S., K.K., D.L., M.P., S.B., V.S., S.M., P.A., D.A., J.F., M.M.-N., M.F., F.K., C.J.W., N.S., H.S., A.S.B., J.M.M.H., G.M.P., N.O.S., J.D., and S.K. contributed exome array genotyping data and analysis. D.J.R. funded, conceived and designed the study. P.Z., S.A.K. and D.J.R. wrote the manuscript with input from all of the authors.

### **Listing of consortia members who contributed to this Research Article:**

---

#### **CHD Exome+ Consortium**

*Primary Investigator:* Adam S. Butterworth, John Danesh, Joanna M. M. Howson, Danish Saleheen, Praveen Surendran

Contributing groups to CHD Exome+ Consortium and Primary Investigators from these groups:

#### **Copenhagen City Heart Study/CIHDS/CGPS**

Sune F. Nielsen, Børge G. Nordestgaard, Ruth Frikke-Schmidt, Anne Tybjærg-Hansen

EPIC-CVD

Adam S. Butterworth, John Danesh, Sarah Watson

#### **PROSPER**

Anton De Craen, Stella Trompet, J. Wouter Jukema

#### **WOSCOPS**

Ian Ford, Christopher J. Packard, Naveed Sattar

#### **PROMIS**

Danish Saleheen, John Danesh

#### **MORGAM**

Philippe Amouyel, Dominique Arveiler, Stefan Blankenberg, Marco Ferrario, Jean Ferrieres,

Frank Kee, Kari Kuulasmaa, Satu Männistö, Markus Perola, Veikko Salomaa, Martina Müller-Nurasyid

## **BRAVE**

Abdulla al Shafi Majumder, Emanuele Di Angelantonio, Rajiv Chowdhury, John Danesh

---

## **Global Lipids Genetics Consortium**

Adam Butterworth, Alanna C. Morrison, Albert V. Smith, Alex P. Reiner, Alexessander Couto Alves, Aliko-Eleni Farmaki, Alisa Manning, Allan Linneberg, Andrew P. Morris, Anette Varbo, Ani Manichaikul, Aniruddh P. Patel, Anna Dominiczak, Anne Langsted, Anne Tybjærg-Hansen, Anne U. Jackson, Annette Peters, Anubha Mahajan, Asif Rasheed, Audrey Y. Chu, Børge G. Nordestgaard, Bruce M. Psaty, Caroline Hayward, Charles L. Kooperberg, Charlotta Pisinger, Christian Gieger, Christian M. Shaffer, Christie M. Ballantyne, Claudia Langenberg, Colin N. A. Palmer, Cramer Christensen, Cristen J. Willer, Dajiang J. Liu, Dan M. Roden, Daniel I. Chasman, Danish Saleheen, David C. M. Liewald, Dewar Alam, Dominique Arveiler, Dorota Pasko, Eirini Marouli, Eleftheria Zeggini, Ellen M. Schmidt, Emanuele di Angelantonio, EPIC-CVD Consortium, Eric Boerwinkle, Erwin P. Bottinger, Francesco Cucca, Franco Giulianini, Frank Kee, Fredrik Karpe, Frida Renström, Gail Davies, George Dedoussis, Georgio Pistis, Gina M. Peloso, Goncalo Abecasis, Gorm B. Jensen, Gudny Eiriksdottir, Hanieh Yaghooskar, Harald Grallert, Hayato Tada, He Zhang, Heather M. Stringham, Helen R. Warren, Hua Tang, Ian Ford, Ian J. Deary, Ivan Brandslund, J. Wouter Jukema, Jaakko Tuomilehto, James G. Wilson, Jarmo Virtamo, Jaspal S. Kooner, Jean Ferrieres, Jean-Claude Tardif, Jennifer E. Huffman, Jerome I. Rotter, Jette Bork-Jensen, Joanna M. M. Howson, Johanna Jakobsdottir, Johanna Kuusisto, Johanne M. Justesen, John C. Chambers, John Danesh, John M. Connell, John M. Starr, Jonathan Martin, Jose M. Ordovas, Joshua C. Bis, Joshua C. Denny, Kari Kuulasmaa, Kathleen E. Stirrups, Kent D. Taylor, Kerrin S. Small, Konstantin Strauch, Kristian Hveem, L. Adrienne Cupples, Lenore J. Launer, Li An Lin, Lia E. Bang, Lorraine Southam, Marco Ferrario, Marianne Benn, Marie-Pierre Dubé, Marit E. Jørgensen, Marjo-Riitta Jarvelin, Mark Caulfield, Mark I. McCarthy, Mark J. Caulfield, Markku Laakso, Markus Perola, Martina Müller-Nurasyid, Mary F. Feitosa, Matt J. Neville, Megan L. Grove, Melanie Waldenberger, Melissa E. Garcia, Michael Boehnke, Ming Xu, Morris Brown, Myriam Fornage, Natalie R. van Zuydam, Naveed Sattar, Neil Poulter, Neil R. Robertson, Nicholas G. D. Masca, Nick J. Wareham, Niels Grarup,

Nilesh J. Samani, Oddgeir L. Holmen, Oluf Pedersen, Panos Deloukas, Patricia B. Munroe, Paul L. Auer, Paul M. Ridker, Paul W. Franks, Pekka Mäntyselkä, Peter E. Weeke, Peter Sever, Philippe Amouyel, Philippe Frossard, Pia R. Kamstrup, Praveen Surendran, Rainer Raumaraa Rajiv Chowdhury, Robert A. Scott, Robin Young, Ruth Frikke-Schmidt, Ruth J.F. Loos, Sandosh Padmanabhan, Santhi K. Ganesh, Sehrish Jabeen, Sekar Kathiresan, Stavroula Kanoni, Stella Trompet, Stephen S. Rich, Sune F. Nielsen, Suthesh Sivapalaratnam, Tamara B. Harris, Tapani Ebeling, The EPIC-InterAct Consortium, Tibor V. Varga, Timo Lakka, Timothy D. Spector, Timothy M. Frayling, Tõnu Esko, Torben Hansen, Torsten Lauritzen, Veikko Salomaa, Vilmundur Gudnason, Wei Gao, Wei Zhou, Weihua Zhang, Xiangfeng Lu, Xueling Sim, Y. Eugene Chen, Yan Zhang, Yanhua Zhou, Yii-Der Ida Chen, Yingchang Lu, Yong Huo

---

**CARDIoGRAM Exome Consortium** Nathan O. Stitzel, Kathleen E. Stirrups, Nicholas G. D. Masca, Jeanette Erdmann, Paola G. Ferrario, Inke R. König, Peter E. Weeke, Thomas R. Webb, Paul L. Auer, Ursula M. Schick, Yingchang Lu, He Zhang, Marie-Pierre Dubé, Anuj Goel, Martin Farrall, Gina M. Peloso, Hong-Hee Won, Ron Do, Erik van Iperen, Stavroula Kanoni, Jochen Kruppa, Anubha Mahajan, Robert A. Scott, Christina Willenborg, Peter S. Braund, Julian C. van Capelleveen, Alex S. F. Doney, Louise A. Donnell, Rosanna Asselta, Piera A. Merlini, Stefano Duga, Nicola Marziliano, Joshua C. Denny, Christian M. Shaffer, Nour Eddine El-Mokhtari, Andre Franke, Omri Gottesman, Stefanie Heilmann, Christian Hengstenberg, Per Hoffmann, Oddgeir L. Holmen, Kristian Hveem, Jan-Håkan Jansson, Karl-Heinz Jöckel, Thorsten Kessler, Jennifer Kriebel, Karl L. Laugwitz, Eirini Marouli, Nicola Martinelli, Mark I. McCarthy, Natalie R. Van Zuydam, Christa Meisinger, Tõnu Esko, Evelin Mihailov, Stefan A. Escher, Maris Alver, Susanne Moebus, Andrew D. Morris, Martina Müller-Nurasyid, Majid Nikpay, Oliviero Olivieri, Louis-Philippe Lemieux Perreault, Alaa AlQarawi, Neil R. Robertson, Karen O. Akinsanya, Dermot F. Reilly, Thomas F. Vogt, Wu Yin, Folkert W. Asselbergs, Charles Kooperberg, Rebecca D. Jackson, Eli Stahl, Konstantin Strauch, Tibor V. Varga, Melanie Waldenberger, Lingyao Zeng, Aldi T. Kraja, Chunyu Liu, Georg B. Ehret, Christopher Newton-Cheh, Daniel I. Chasman, Rajiv Chowdhury, Marco Ferrario, Ian Ford, J. Wouter Jukema, Frank Kee, Kari Kuulasmaa, Børge G. Nordestgaard, Markus Perola, Danish Saleheen, Naveed Sattar, Praveen Surendran, David Tregouet, Robin Young, Joanna M. M. Howson, Adam S. Butterworth, John Danesh, Diego Ardissino, Erwin P. Bottinger, Raimund Erbel, Paul

W. Franks, Domenico Girelli, Alistair S. Hall, G. Kees Hovingh, Adnan Kastrati, Wolfgang Lieb, Thomas Meitinger, William E. Kraus, Svati H. Shah, Ruth McPherson, Marju Orholm-Melander, Olle Melander, Andres Metspalu, Colin N. A. Palmer, Annette Peters, Daniel J. Rader, Muredach P. Reilly, Ruth J. F. Loos, Alex P. Reiner, Dan M. Roden, Jean-Claude Tardif, John R. Thompson, Nicholas J. Wareham, Hugh Watkins, Cristen J. Willer, Panos Deloukas, Nilesh J. Samani, Heribert Schunkert, Sekar Kathiresan

## **AUTHORS AND AFFILIATIONS BY GROUP**

### **CHD Exome+ Consortium**

#### **Primary Investigators**

Adam S. Butterworth

Cardiovascular Epidemiology Unit, Department of Public Health and Primary Care, University of Cambridge, Cambridge, UK.

John Danesh

Cardiovascular Epidemiology Unit, Department of Public Health and Primary Care, University of Cambridge, Cambridge, UK. Wellcome Trust Sanger Institute, Genome Campus, Hinxton CB10 1HH, UK.

Joanna M. M. Howson

Cardiovascular Epidemiology Unit, Department of Public Health and Primary Care, University of Cambridge, Cambridge, UK.

Danish Saleheen

Cardiovascular Epidemiology Unit, Department of Public Health and Primary Care, University of Cambridge, Cambridge, UK. Department of Biostatistics and Epidemiology, Perelman School of Medicine, University of Pennsylvania, Philadelphia, PA, USA. Centre for Non-Communicable Diseases, Karachi, Pakistan.

Praveen Surendran

Cardiovascular Epidemiology Unit, Department of Public Health and Primary Care, University of Cambridge, Cambridge, UK

Contributing groups to CHD Exome+ Consortium and Primary Investigators from these groups:

#### **Copenhagen City Heart Study/CIHDS/CGPS**

Sune F. Nielsen

Department of Clinical Biochemistry Herlev Hospital, Copenhagen University Hospital, Herlev, Denmark.

Børge G. Nordestgaard

Department of Clinical Biochemistry Herlev Hospital, Copenhagen University Hospital, Herlev, Denmark.

Ruth Frikke-Schmidt

Department of Clinical Biochemistry, Rigshospitalet, Copenhagen University Hospital, Copenhagen, Denmark.

Anne Tybjærg-Hansen

Copenhagen University Hospital, University of Copenhagen, Copenhagen, Denmark.

EPIC-CVD

Adam S. Butterworth

Cardiovascular Epidemiology Unit, Department of Public Health and Primary Care, University of Cambridge, Cambridge, UK.

John Danesh

Cardiovascular Epidemiology Unit, Department of Public Health and Primary Care, University of Cambridge, Cambridge, UK. Wellcome Trust Sanger Institute, Genome Campus, Hinxton CB10 1HH, UK.

Sarah Watson

Cardiovascular Epidemiology Unit, Department of Public Health and Primary Care, University of Cambridge, Cambridge, UK.

## **MORGAM**

Philippe Amouyel

Department of Epidemiology and Public Health, Institut Pasteur de Lille, Lille, France.

Dominique Arveiler

Department of Epidemiology and Public Health, EA 3430, University of Strasbourg, Strasbourg, F- 67085, France.

Stefan Blankenberg

Department of General and Interventional Cardiology, University Heart Center Hamburg, Germany. University Medical Center Hamburg-Eppendorf, Hamburg, Germany.

Marco Ferrario

Research Centre in Epidemiology and Preventive Medicine – EPIMED, Department of Clinical and Experimental Medicine, University of Insubria, Via O Rossi 9, 21100 Varese, Italy.

Jean Ferrieres

Department of Epidemiology, UMR 1027- INSERM, Toulouse University-CHU Toulouse, Toulouse, France.

Frank Kee

UKCRC Centre of Excellence for Public Health, Queens University, Belfast, Northern Ireland.

Kari Kuulasmaa

Department of Health, National Institute for Health and Welfare, Helsinki, Finland.

Satu Männistö

Department of Health, National Institute for Health and Welfare, Helsinki, Finland.

Martina Müller-Nurasyid

Institute of Genetic Epidemiology, Helmholtz Zentrum München, German Research Center for Environmental Health, Neuherberg, Germany

Markus Perola

Department of Health, National Institute for Health and Welfare, Helsinki, Finland. Institute of Molecular Medicine FIMM, University of Helsinki, Finland.

Veikko Salomaa

Department of Health, National Institute for Health and Welfare, FI-00271, Helsinki, Finland.

Martina Müller-Nurasyid

Institute of Genetic Epidemiology, Helmholtz Zentrum München - German Research Center for Environmental Health, Neuherberg, Germany. Department of Medicine I, Ludwig-Maximilians-Universität, Munich, Germany. DZHK (German Centre for Cardiovascular Research), partner site Munich Heart Alliance, Munich, Germany.

## **PROSPER**

Anton De Craen

Leiden University Medical Center, Leiden, The Netherlands

Stella Trompet

Leiden University Medical Center, Leiden, The Netherlands

J. Wouter Jukema

Leiden University Medical Center, Leiden, The Netherlands

**WOSCOPS**

Ian Ford

University of Glasgow, Glasgow, Scotland, UK.

Christopher J. Packard

University of Glasgow, Glasgow, Scotland, UK.

Naveed Sattar

University of Glasgow, Glasgow, Scotland, UK.

**BRAVE**

Abdulla al Shafi Majumder

National Institute of Cardiovascular Diseases, Sher-e-Bangla Nagar, Dhaka, Bangladesh.

Dewan S. Alam

ICDDR, B; Mohakhali, Dhaka 1212, Bangladesh.

Emanuele Di Angelantonio, Rajiv Chowdhury, John Danesh

Cardiovascular Epidemiology Unit, Department of Public Health and Primary Care, University of Cambridge, Cambridge, UK.

**PROMIS**

Danish Saleheen

Cardiovascular Epidemiology Unit, Department of Public Health and Primary Care, University of Cambridge, Cambridge, UK. Department of Biostatistics and Epidemiology, Perelman School of Medicine, University of Pennsylvania, Philadelphia, PA, USA. Centre for Non-Communicable Diseases, Karachi, Pakistan.

John Danesh

Department of Public Health and Primary Care, Strangeways Research Laboratory, University of Cambridge, Cambridge CB1 8RN, UK.

---

**Global Lipids Genetics Consortium**

Adam Butterworth

Cardiovascular Epidemiology Unit, Department of Public Health and Primary Care, University of Cambridge, Cambridge, UK.



The National Institute for Health Research Blood and Transplant Unit (NIHR BTRU) in Donor Health and Genomics at the University of Cambridge, UK.

Alanna C. Morrison

Human Genetics Center, School of Public Health, The University of Texas School Health Science Center at Houston, Houston, TX 77030, USA.

Albert V. Smith

The Icelandic Heart Association, Kopavogur, Iceland. The University of Iceland, Reykjavik, Iceland.

Alex P. Reiner

Department of Epidemiology, University of Washington, Seattle WA 98195, USA. Division of Public Health Sciences, Fred Hutchinson Cancer Research Center, Seattle WA 98195, USA.

Alexessander Couto Alves

Faculty of Medicine, School of Public Health, Imperial College London

Aliki-Eleni Farmaki

Department of Nutrition and Dietetics, School of Health Science and Education, Harokopio University, Athens, Greece. Harokopio University of Athens, Kallithea, Athens, Greece.

Alisa Manning

Broad Institute of the Massachusetts Institute of Technology and Harvard University, Cambridge, MA 02142, USA

Allan Linneberg

Research Centre for Prevention and Health, Capital Region of Denmark, Copenhagen, Denmark. Department of Clinical Experimental Research, Glostrup University Hospital, Glostrup, Denmark. Department of Clinical Medicine, Faculty of Health and Medical Sciences, University of Copenhagen, Copenhagen, Denmark.

Andrew P. Morris

Department of Biostatistics, University of Liverpool, Liverpool, UK. Wellcome Trust Centre for Human Genetics, University of Oxford, Oxford, UK.

Anette Varbo

Department of Clinical Biochemistry and The Copenhagen General Population Study, Herlev and Gentofte Hospital, Copenhagen University Hospital, Denmark, and Faculty of Health and

Medical Sciences, University of Denmark, Denmark. Department of Clinical Biochemistry, 54M1, Herlev and Gentofte Hospital, Copenhagen University Hospital, Herlev, Denmark.

Ani Manichaikul

Center for Public Health Genomics, University of Virginia, Charlottesville, VA 22903, USA

Aniruddh P. Patel

Center for Human Genetic Research, Massachusetts General Hospital, Boston, MA 02114, USA.

Cardiovascular Research Center, Massachusetts General Hospital, Boston, MA 02114, USA.

Department of Medicine, Harvard Medical School, Boston, MA 02114, USA. Program in Medical and Population Genetics, Broad Institute, 7 Cambridge Center, Cambridge, MA 02142, USA.

Anna Dominiczak

Institute of Cardiovascular and Medical Sciences, College of Medical, Veterinary and Life Sciences, University of Glasgow, Glasgow G12 8TA, Scotland, UK.

Anne Langsted

Department of Clinical Biochemistry and The Copenhagen General Population Study, Herlev and Gentofte Hospital, Copenhagen University Hospital, Denmark, and Faculty of Health and Medical Sciences, University of Denmark, Denmark.

Anne Tybjaerg-Hansen

Department of Clinical Biochemistry, Rigshospitalet, Copenhagen, Denmark and Faculty of Health and Medical Sciences, University of Copenhagen, Denmark.

Anne U. Jackson

Department of Biostatistics and Center for Statistical Genetics, University of Michigan, Ann Arbor, MI 48109, USA.

Annette Peters

Institute for Epidemiology II, Helmholtz Zentrum München, Neuherberg, Germany.

German Center for Cardiovascular Disease Research, partner-site Munich, Munich, Germany.

German Center for Diabetes Research, Neuherberg, Germany.

Anubha Mahajan

Wellcome Trust Centre for Human Genetics, Nuffield Department of Medicine, University of Oxford, Oxford, UK.

Asif Rasheed

Center for Non-Communicable Diseases, Karachi, Pakistan.

Audrey Y. Chu

Division of Preventive Medicine, Brigham and Women's Hospital, Boston, MA 02215, USA.

NHLBI Framingham Heart Study, Framingham, MA 01702, USA.

Børge G. Nordestgaard

Department of Clinical Biochemistry and The Copenhagen General Population Study, Herlev and Gentofte Hospital, Copenhagen University Hospital, Denmark, and Faculty of Health and Medical Sciences, University of Denmark, Denmark.

Bruce M. Psaty

Cardiovascular Health Research Unit, Departments of Medicine, Epidemiology, and Health Services, University of Washington, Seattle, WA 98101, USA. Group Health Research Institute, Group Health Cooperative, Seattle, WA 98101, USA.

Caroline Hayward

Generation Scotland, Centre for Genomic and Experimental Medicine, Institute of Genetics and Molecular Medicine, University of Edinburgh, Edinburgh, UK. Medical Research Council Human Genetics Unit, Institute of Genetics and Molecular Medicine, University of Edinburgh, Edinburgh, UK.

Charles L. Kooperberg

Division of Public Health Sciences, Fred Hutchinson Cancer Research Center, Seattle WA 98195, USA.

Charlotta Pisinger

Research Centre for Prevention and Health, Capital Region of Denmark, Copenhagen, Denmark.

Christian Gieger

Research Unit of Molecular Epidemiology, Helmholtz Zentrum München, German Research Center for Environmental Health, Neuherberg, Germany. Institute of Epidemiologie II, Helmholtz Zentrum München, German Research Center for Environmental Health, Neuherberg, Germany. German Center for Diabetes Research (DZD e.V.), Neuherberg, Germany.

Christian M. Shaffer

Department of Medicine, Vanderbilt University Medical Center, Nashville, TN 37232, USA.

Christie M. Ballantyne

Department of Medicine, Baylor College of Medicine, Houston, TX 77030, USA.

Claudia Langenberg

MRC Epidemiology Unit, Institute of Metabolic Science, University of Cambridge School of Clinical Medicine, Cambridge, UK.

Colin N. A. Palmer

Medical Research Institute, University of Dundee, Ninewells Hospital and Medical School, Dundee, UK.

Cramer Christensen

Medical department, Lillebaelt Hospital, Vejle, Denmark.

Cristen J. Willer

Department of Internal Medicine, Division of Cardiovascular Medicine, University of Michigan, Ann Arbor, Michigan 48109, USA. Department of Computational Medicine and Bioinformatics, University of Michigan, Ann Arbor, Michigan 48109, USA. Department of Human Genetics, University of Michigan, Ann Arbor, Michigan 48109, USA.

Dajiang J. Liu

Department of Public Health Sciences and Institute of Personalized Medicine, College of Medicine, Penn State College of Medicine, Hershey, PA 17033, USA.

Dan M. Roden

Department of Medicine, Vanderbilt University Medical Center, Nashville, TN 37232, USA.

Daniel I. Chasman

Division of Preventive Medicine, Department of Medicine, Brigham and Women's Hospital and Harvard Medical School, Boston, MA 02215, USA.

Danish Saleheen

Department of Biostatistics and Epidemiology, Perelman School of Medicine, University of Pennsylvania, Philadelphia, PA 19104, USA. Centre for Non-Communicable Diseases, Karachi, Pakistan. Cardiovascular Epidemiology Unit, Department of Public Health and Primary Care, University of Cambridge, Cambridge, UK.

David C. M. Liewald

Centre for Cognitive Ageing and Cognitive Epidemiology, University of Edinburgh, Edinburgh, UK. Department of Psychology, University of Edinburgh, Edinburgh, UK.

Dewan S. Alam

ICDDR, B; Mohakhali, Dhaka 1212, Bangladesh.

Dominique Arveiler

Department of Epidemiology and Public Health, EA 3430, University of Strasbourg, Strasbourg, F- 67085, France.

Dorota Pasko

Genetics of Complex Traits, University of Exeter Medical School, University of Exeter, Exeter, EX2 5DW, UK.

Eirini Marouli

William Harvey Research Institute, Barts and The London School of Medicine and Dentistry, Queen Mary University of London, London, UK.

Eleftheria Zeggini

Wellcome Trust Sanger Institute, Hinxton, CB10 1SA, UK.

Ellen M. Schmidt

Department of Computational Medicine and Bioinformatics, University of Michigan, Ann Arbor, MI 48109, USA.

Emanuele di Angelantonio

Cardiovascular Epidemiology Unit, Department of Public Health and Primary Care, University of Cambridge, Cambridge, UK. The National Institute for Health Research Blood and Transplant Unit (NIHR BTRU) in Donor Health and Genomics at the University of Cambridge, UK.

EPIC-CVD Consortium

Eric Boerwinkle

Human Genetics Center, School of Public Health, The University of Texas School Health Science Center at Houston, Houston, TX 77225, USA.

Erwin P. Bottinger

The Charles Bronfman Institute for Personalized Medicine, Icahn School of Medicine at Mount Sinai, New York, NY 10029, USA.

Francesco Cucca

Istituto di Ricerca Genetica e Biomedica (IRGB), Consiglio Nazionale delle Ricerche, c/o Cittadella Universitaria di Monserrato, Cagliari, Italy. Department of Biomedical Sciences, Azienda Ospedaliero-Universitaria di Sassari, Sassari, Italy.

Franco Giulianini

Division of Preventive Medicine, Department of Medicine, Brigham and Women's Hospital and Harvard Medical School, Boston, MA 02215, USA.

Frank Kee

Director, UKCRC Centre of Excellence for Public Health, Queens University, Belfast, Northern Ireland.

Fredrik Karpe

Oxford Centre for Diabetes, Endocrinology and Metabolism, Radcliffe Department of Medicine, University of Oxford, Oxford, UK. Oxford NIHR Biomedical Research Centre, Oxford University Hospitals Trust, Oxford, UK.

Frida Renström

Department of Clinical Sciences, Genetic and Molecular Epidemiology Unit, Lund University, Malmö, Sweden. Department of Biobank Research, Umeå University, Umeå, Sweden.

Gail Davies

Centre for Cognitive Ageing and Cognitive Epidemiology, University of Edinburgh, Edinburgh, UK. Department of Psychology, University of Edinburgh, Edinburgh, UK.

George Dedoussis

Department of Nutrition and Dietetics, School of Health Science and Education, Harokopio University, Athens, 17671, Greece.

Georgio Pistis

Istituto di Ricerca Genetica e Biomedica, Consiglio Nazionale delle Ricerche (CNR), Monserrato, Cagliari, Italy.

Gina M. Peloso

Center for Human Genetic Research, Massachusetts General Hospital, Boston, MA 02114, USA. Cardiovascular Research Center, Massachusetts General Hospital, Boston, MA 02114, USA. Department of Medicine, Harvard Medical School, Boston, MA 02114, USA. Program in Medical and Population Genetics, Broad Institute, 7 Cambridge Center, Cambridge, MA 02142, USA. Department of Biostatistics, Boston University School of Public Health, Boston, MA 02118, USA.

Goncalo Abecasis

Center for Statistical Genetics, Department of Biostatistics, University of Michigan, Ann Arbor, MI 48109, USA.

Gorm B. Jensen

The Copenhagen City Heart Study, Frederiksberg Hospital, Denmark.

Gudny Eiriksdottir

The Icelandic Heart Association, Kopavogur, Iceland.

Hanieh Yaghootkar

Genetics of Complex Traits, University of Exeter Medical School, University of Exeter, Exeter EX2 5DW, UK.

Harald Grallert

Research Unit of Molecular Epidemiology, Helmholtz Zentrum Muenchen, German Research Center for Environmental Health, Neuherberg, Germany. Institute of Epidemiologie II, Helmholtz Zentrum Muenchen, German Research Center for Environmental Health, Neuherberg, Germany. German Center for Diabetes Research (DZD e.V.), Neuherberg, Germany.

Hayato Tada

Division of Cardiovascular Medicine, Kanazawa University Graduate School of Medicine, Kanazawa, Japan.

He Zhang

Department of Internal Medicine, Division of Cardiovascular Medicine, University of Michigan, Ann Arbor, MI 48109, USA.

Heather M. Stringham

Department of Biostatistics and Center for Statistical Genetics, University of Michigan, Ann Arbor, MI 48109, USA.

Helen R. Warren

Clinical Pharmacology, William Harvey Research Institute, Barts and The London, Queen Mary University of London, Charterhouse Square, London, EC1M 6BQ, UK.

Hua Tang

Department of Genetics, Stanford University School of Medicine, Stanford, CA 94305, USA.

Ian Ford

University of Glasgow, Glasgow, UK.

Ian J. Deary

Centre for Cognitive Ageing and Cognitive Epidemiology, University of Edinburgh, Edinburgh, UK. Department of Psychology, University of Edinburgh, Edinburgh, UK.

Ivan Brandslund

Department of Clinical Biochemistry, Lillebaelt Hospital, Vejle, Denmark. Institute of Regional Health Research, University of Southern Denmark, Odense, Denmark.

J. Wouter Jukema

Department of Cardiology, Leiden University Medical Center, Leiden, the Netherlands.

Interuniversity Cardiology Institute of the Netherlands, Utrecht, The Netherlands.

Jaakko Tuomilehto

Chronic Disease Prevention Unit, National Institute for Health and Welfare, 00271 Helsinki, Finland. Dasman Diabetes Institute, Dasman 15462, Kuwait. Centre for Vascular Prevention, Danube-University Krems, 3500 Krems, Austria. Saudi Diabetes Research Group, King Abdulaziz University, Fahd Medical Research Center, Jeddah 21589, Saudi Arabia.

James G. Wilson

Department of Physiology and Biophysics, University of Mississippi Medical Center, Jackson, MS 39216, USA.

Jarmo Virtamo

Department of Health, National Institute for Health and Welfare, FI-00271, Helsinki, Finland.

Jaspal S. Kooner

National Heart and Lung Institute, Imperial College London, Hammersmith Hospital Campus, London, UK. Department of Cardiology, Ealing Hospital NHS Trust, Uxbridge Road, Southall, Middlesex UB1 3HW, UK. Imperial College Healthcare NHS Trust, London, UK.

Jean Ferrieres

Department of Epidemiology, UMR 1027- INSERM, Toulouse University-CHU Toulouse, Toulouse, France.

Jean-Claude Tardif

Montreal Heart Institute, Montreal, Quebec, Canada. Université de Montréal, Montreal, Quebec, Canada.

Jennifer E. Huffman

Framingham Heart Study, Population Sciences Branch, Division of Intramural Research National Heart Lung and Blood Institute, National Institutes of Health, Framingham, MA 02118, USA.

Jerome I. Rotter



The Institute for Translational Genomics and Population Sciences, Departments of Pediatrics and Medicine, LABioMed at Harbor-UCLA Medical Center, Torrance, CA 90502, USA.

Jette Bork-Jensen

The Novo Nordisk Foundation Center for Basic Metabolic Research, Faculty of Health and Medical Sciences, University of Copenhagen, Copenhagen, Denmark.

Joanna M. M. Howson

Cardiovascular Epidemiology Unit, Department of Public Health and Primary Care, University of Cambridge, Cambridge, UK.

Johanna Jakobsdottir

The Icelandic Heart Association, Kopavogur, Iceland. The University of Iceland, Reykjavik, Iceland.

Johanna Kuusisto

Institute of Clinical Medicine, Internal Medicine, University of Eastern Finland and Kuopio University Hospital, 70210 Kuopio, Finland.

Johanne M. Justesen

The Novo Nordisk Foundation Center for Basic Metabolic Research, Faculty of Health and Medical Sciences, University of Copenhagen, Copenhagen, Denmark.

John C. Chambers

Department of Epidemiology and Biostatistics, School of Public Health, Imperial College London, Norfolk Place, London W2 1PG, UK. Department of Cardiology, Ealing Hospital NHS Trust, Uxbridge Road, Southall, Middlesex UB1 3HW, UK. Imperial College Healthcare NHS Trust, London, UK.

John Danesh

Cardiovascular Epidemiology Unit, Department of Public Health and Primary Care, University of Cambridge, Cambridge, UK. The National Institute for Health Research Blood and Transplant Unit (NIHR BTRU) in Donor Health and Genomics at the University of Cambridge, UK. Wellcome Trust Sanger Institute, Genome Campus, Hinxton CB10 1HH, UK.

John M. Connell

Medical Research Institute, University of Dundee, Ninewells Hospital and Medical School, Dundee, UK.

John M. Starr

Centre for Cognitive Ageing and Cognitive Epidemiology, University of Edinburgh, Edinburgh, UK. Alzheimer Scotland Dementia Research Centre, University of Edinburgh, Edinburgh, UK.

Jonathan Martin

Generation Scotland, Centre for Genomic and Experimental Medicine, Institute of Genetics and Molecular Medicine, University of Edinburgh, Edinburgh, UK.

Jose M. Ordovas

Department of Cardiovascular Epidemiology and Population Genetics, National Center for Cardiovascular Investigation, Madrid 28049, Spain.

Nutrition and Genomics Laboratory, Jean Mayer-USDA Human Nutrition Research Center on Aging at Tufts University, Boston, MA 02111, USA.

Joshua C. Bis

Cardiovascular Health Research Unit, Department of Medicine, University of Washington, Seattle, WA 98102, USA

Joshua C. Denny

Departments of Medicine and Biomedical Informatics, Vanderbilt University Medical Center, Nashville, TN 37203, USA

Kari Kuulasmaa

Department of Health, National Institute for Health and Welfare, FI-00271, Helsinki, Finland.

Kathleen E. Stirrups

Department of Haematology, University of Cambridge, Cambridge, UK. William Harvey Research Institute, Barts and The London School of Medicine and Dentistry, Queen Mary University of London, London, UK.

Kent D. Taylor

Los Angeles Biomedical Research Institute at Harbor, UCLA, Los Angeles, CA 90048, USA.

Kerrin S. Small

Department of Twin Research and Genetic Epidemiology, King's College London, London, UK.

Konstantin Strauch

Institute of Genetic Epidemiology, Helmholtz Zentrum München - German Research Center for Environmental Health, Neuherberg, Germany.

Institute of Medical Informatics, Biometry and Epidemiology, Chair of Genetic Epidemiology, Ludwig-Maximilians-Universität, Munich, Germany.

Kristian Hveem

Department of Public Health and General Practice, HUNT Research Centre, Norwegian University of Science and Technology.

L. Adrienne Cupples

Department of Biostatistics, Boston University School of Public Health, Boston, MA 02118, USA.

Lenore J. Launer

Laboratory of Epidemiology and Population Sciences, National Institute on Aging, Bethesda, MD 20892, USA.

Li An Lin

Institute of Molecular Medicine; the University of Texas Health Science Center at Houston, Houston, TX 77030, USA.

Lia E. Bang

Department of Cardiology, Rigshospitalet, Copenhagen University Hospital, Copenhagen, Denmark.

Lorraine Southam

Wellcome Trust Sanger Institute, Hinxton, CB10 1SA, UK. Wellcome Trust Centre for Human Genetics, University of Oxford, Oxford, OX3 7BN, UK. Wellcome Trust Sanger Institute, The Morgan Building, Wellcome Trust Genome Campus, Hinxton, Cambridge, CB10 1HH, UK.

Marco Ferrario

Research Centre in Epidemiology and Preventive Medicine – EPIMED, Department of Clinical and Experimental Medicine, University of Insubria, Via O Rossi 9, 21100 Varese, Italy.

Marianne Benn

Department of Clinical Biochemistry and The Copenhagen General Population Study, Herlev and Gentofte Hospital, Copenhagen University Hospital, Denmark, and Faculty of Health and Medical Sciences, University of Denmark, Denmark.

Marie-Pierre Dubé

Montreal Heart Institute, Montreal, Quebec, Canada; 2) Université de Montréal, Montreal, Quebec, Canada.

Université de Montréal Beaulieu-Saucier Pharmacogenomics Center, Montreal, Quebec, Canada.

Marit E. Jørgensen

Steno Diabetes Center, Gentofte, Denmark; National Institute of Public Health, Southern Denmark University, Denmark.

Marjo-Riitta Jarvelin

Department of Epidemiology and Biostatistics, School of Public Health, Imperial College London.

Mark Caulfield

Clinical Pharmacology, William Harvey Research Institute, Queen Mary University of London, London, EC1M 6BQ, UK. NIHR Barts Cardiovascular Biomedical Research Unit, Queen Mary University of London, London, EC1M 6BQ, UK.

Mark I. McCarthy

Oxford Centre for Diabetes, Endocrinology and Metabolism, Radcliffe Department of Medicine, University of Oxford, Oxford, UK. Wellcome Trust Centre for Human Genetics, Nuffield Department of Medicine, University of Oxford, Oxford, UK. Oxford NIHR Biomedical Research Centre, Oxford University Hospitals Trust, Oxford, UK.

Mark J. Caulfield

The Barts Heart Centre, William Harvey Research Institute, Queen Mary University of London, Charterhouse Square, London EC1M 6BQ. Clinical Pharmacology, William Harvey Research Institute, Barts and The London, Queen Mary University of London, Charterhouse Square, London, EC1M 6BQ, UK.

Markku Laakso

Institute of Clinical Medicine, Internal Medicine, University of Eastern Finland and Kuopio University Hospital, 70210 Kuopio, Finland.

Markus Perola

Department of Health, National Institute for Health and Welfare, FI-00271, Helsinki, Finland. Institute of Molecular Medicine FIMM, University of Helsinki, Finland.

Martina Müller-Nurasyid

Institute of Genetic Epidemiology, Helmholtz Zentrum München - German Research Center for Environmental Health, Neuherberg, Germany. Department of Medicine I, Ludwig-Maximilians-Universität, Munich, Germany. DZHK (German Centre for Cardiovascular Research), partner site Munich Heart Alliance, Munich, Germany.

Mary F. Feitosa

Division of Statistical Genomics, Department of Genetics, Washington University School of Medicine, St. Louis, MO 63108, USA.

Matt J. Neville

Oxford Centre for Diabetes, Endocrinology and Metabolism, Radcliffe Department of Medicine, University of Oxford, Oxford, UK.

Megan L. Grove

Human Genetics Center, School of Public Health, The University of Texas School Health Science Center at Houston, Houston, TX 77030. USA.

Melanie Waldenberger

Institute of Epidemiology II, Helmholtz Zentrum München, German Research Center for Environmental Health, Neuherberg, 85764, Germany. Research Unit of Molecular Epidemiology, Helmholtz Zentrum München, German Research Center for Environmental Health, Neuherberg, 85764, Germany.

Melissa E. Garcia

Laboratory of Epidemiology and Population Sciences, National Institute on Aging, Bethesda, MD 20892, USA.

Michael Boehnke

Department of Biostatistics and Center for Statistical Genetics, University of Michigan, Ann Arbor, MI 48109, USA.

Ming Xu

Department of Cardiology, Institute of Vascular Medicine, Peking University Third Hospital, Key Laboratory of Molecular Cardiovascular Sciences, Ministry of Education, Beijing 100191, China.

Morris Brown

Clinical Pharmacology Unit, University of Cambridge, Addenbrookes Hospital, Hills Road, Cambridge CB2 2QQ, UK.

Myriam Fornage

Institute of Molecular Medicine; the University of Texas Health Science Center at Houston, Houston, TX 77030, USA.

Natalie R. van Zuydam

Medical Research Institute, University of Dundee, UK. WTCHG, Oxford University, Oxford, Oxfordshire, UK.

Naveed Sattar

University of Glasgow, Glasgow, UK.

Neil Poulter

International Centre for Circulatory Health, Imperial College London, W2 1PG, UK.

Neil R. Robertson

Wellcome Trust Centre for Human Genetics, Nuffield Department of Medicine, University of Oxford, Oxford, UK. Oxford Centre for Diabetes, Endocrinology and Metabolism, Radcliffe Department of Medicine, University of Oxford, Oxford, UK.

Nicholas G. D. Masca

Department of Cardiovascular Sciences, University of Leicester, UK; NIHR Leicester Cardiovascular Biomedical Research Unit, Glenfield Hospital, Leicester, UK.

Nick J. Wareham

MRC Epidemiology Unit, Institute of Metabolic Science, University of Cambridge School of Clinical Medicine, Cambridge, UK.

Niels Grarup

The Novo Nordisk Foundation Center for Basic Metabolic Research, Faculty of Health and Medical Sciences, University of Copenhagen, Copenhagen, Denmark.

Nilesh J. Samani

Department of Cardiovascular Sciences, University of Leicester, UK; NIHR Leicester Cardiovascular Biomedical Research Unit, Glenfield Hospital, UK. BHF Cardiovascular Research Centre, Glenfield Hospital, Leicester, LE3 9QP, UK.

Oddgeir L. Holmen

Department of Public Health and General Practice, HUNT Research Centre, Norwegian University of Science and Technology, 7600 Levanger, Norway. St Olav Hospital, Trondheim University Hospital, 7030 Trondheim, Norway.

Oluf Pedersen

The Novo Nordisk Foundation Center for Basic Metabolic Research, Faculty of Health and Medical Sciences, University of Copenhagen, Copenhagen, Denmark.

Panos Deloukas

William Harvey Research Institute, Barts and The London School of Medicine and Dentistry, Queen Mary University of London, London, UK. Princess Al-Jawhara Al-Brahim Centre of Excellence in Research of Hereditary Disorders (PACER-HD), King Abdulaziz University, Jeddah 21589, Saudi Arabia.

Patricia B. Munroe

Clinical Pharmacology, William Harvey Research Institute, Queen Mary University of London, London, EC1M 6BQ, UK. NIHR Barts Cardiovascular Biomedical Research Unit, Queen Mary University of London, London, EC1M 6BQ, UK.

Paul L. Auer

Zilber School of Public Health, University of Wisconsin-Milwaukee, Milwaukee WI 53201, USA.

Paul M. Ridker

Division of Preventive Medicine, Brigham and Women's Hospital, Boston, MA 02215, USA.

Paul W. Franks

Department of Clinical Sciences, Genetic and Molecular Epidemiology Unit, Lund University, Malmö, Sweden. Department of Nutrition, Harvard T. H. Chan School of Public Health, Boston, MA 02115, USA. Department of Public Health & Clinical Medicine, Umeå University, Umeå, Sweden.

Pekka Mäntyselkä

Department of General Medicine, University of Eastern Finland, Kuopio, Finland.

Peter E. Weeke

Department of Medicine, Vanderbilt, University Medical Center, Nashville, TN 37232, USA.

The Heart Centre, Department of Cardiology, Copenhagen University Hospital, Rigshospitalet, Copenhagen, Denmark.

Peter Sever

International Centre for Circulatory Health, Imperial College London, W2 1PG, UK.

Philippe Amouyel

Department of Epidemiology and Public Health, Institut Pasteur de Lille, Lille, France.

Philippe Frossard

Center for Non-Communicable Diseases, Karachi, Pakistan.

Pia R. Kamstrup

Department of Clinical Biochemistry and The Copenhagen General Population Study, Herlev and Gentofte Hospital, Copenhagen University Hospital, Denmark, and Faculty of Health and Medical Sciences, University of Denmark, Denmark.

Praveen Surendran

Cardiovascular Epidemiology Unit, Department of Public Health and Primary Care, University of Cambridge, Cambridge, UK.

Rainer Raumaraa

Kuopio Research Institute of Exercise Medicine, Kuopio, Finland and Department of Clinical Physiology and Nuclear Medicine, Kuopio University Hospital, Kuopio, Finland.

Rajiv Chowdhury

Cardiovascular Epidemiology Unit, Department of Public Health and Primary Care, University of Cambridge, Cambridge, UK.

Robert A. Scott

MRC Epidemiology Unit, Institute of Metabolic Science, University of Cambridge School of Clinical Medicine, Cambridge, UK.

Robin Young

Cardiovascular Epidemiology Unit, Department of Public Health and Primary Care, University of Cambridge, Cambridge, UK.

Ruth Frikke-Schmidt

Department of Clinical Biochemistry, Rigshospitalet, Copenhagen, Denmark and Faculty of Health and Medical Sciences, University of Copenhagen, Denmark.

Ruth J. F. Loos

The Charles Bronfman Institute for Personalized Medicine, Icahn School of Medicine at Mount Sinai, New York, NY 10029, USA.

The Mindich Child Health and Development Institute, Ichan School of Medicine at Mount Sinai, New York, NY 10029, USA.

Sandosh Padmanabhan

Institute of Cardiovascular and Medical Sciences, School of Medicine, University of Glasgow, Glasgow, UK.

Santhi K. Ganesh



Department of Internal Medicine, Division of Cardiovascular Medicine, University of Michigan, Ann Arbor, MI 48109, USA.

Department of Human Genetics, University of Michigan, Ann Arbor, Michigan 48109, USA.

Sehrish Jabeen

Center for Non-Communicable Diseases, Karachi, Pakistan.

Sekar Kathiresan

Center for Human Genetic Research, Massachusetts General Hospital, Boston, MA 02114, USA.

Cardiovascular Research Center, Massachusetts General Hospital, Boston, MA 02114, USA.

Department of Medicine, Harvard Medical School, Boston, MA 02114, USA. Program in

Medical and Population Genetics, Broad Institute, 7 Cambridge Center, Cambridge, MA 02142, USA.

Stavroula Kanoni

William Harvey Research Institute, Barts and The London School of Medicine and Dentistry, Queen Mary University of London, London, UK.

Stella Trompet

Department of Cardiology, Leiden University Medical Center, Leiden, the Netherlands.

Department of Gerontology and Geriatrics, Leiden University Medical Center, Leiden, the Netherlands.

Stephen S. Rich

Center for Public Health Genomics, University of Virginia, Charlottesville, VA 22903, USA.

Sune F. Nielsen

Department of Clinical Biochemistry and The Copenhagen General Population Study, Herlev and Gentofte Hospital, Copenhagen University Hospital, Denmark, and Faculty of Health and Medical Sciences, University of Denmark, Denmark.

Suthesh Sivapalaratnam

Department of Vascular Medicine, Academic Medical Center, University of Amsterdam, Amsterdam, NL.

Tamara B. Harris

Laboratory of Epidemiology and Population Sciences, National Institute on Aging, Bethesda, MD 20892, USA.

Tapani Ebeling

Department of Medicine, Oulu University Hospital, Oulu, Finland.

**The EPIC-InterAct consortium**

Tibor V. Varga

Department of Clinical Sciences, Genetic and Molecular Epidemiology Unit, Lund University, Malmö, Sweden.

Timo Lakka

Department of Physiology, Institute of Biomedicine, University of Eastern Finland, Kuopio Campus, Kuopio, Finland and Kuopio Research Institute of Exercise Medicine, Kuopio, Finland.

Timothy D. Spector

Department of Twin Research and Genetic Epidemiology, King's College London, London, UK.

Timothy M. Frayling

Genetics of Complex Traits, University of Exeter Medical School, University of Exeter, Exeter EX2 5DW, UK.

Tõnu Esko

Broad Institute of the Massachusetts Institute of Technology and Harvard University, Cambridge, MA 02142, USA. Estonian Genome Center, University of Tartu, Tartu, Estonia.

Division of Endocrinology, Genetics and Basic and Translational Obesity Research, Children's Hospital Boston, Boston, MA 02115, USA.

Torben Hansen

The Novo Nordisk Foundation Center for Basic Metabolic Research, Faculty of Health and Medical Sciences, University of Copenhagen, Copenhagen, Denmark. Faculty of Health Sciences, University of Southern Denmark, Odense, Denmark.

Torsten Lauritzen

Department of Public Health, Section of General Practice, University of Aarhus, Aarhus, Denmark.

Veikko Salomaa

Department of Health, National Institute for Health and Welfare, FI-00271, Helsinki, Finland.

Vilmundur Gudnason

The Icelandic Heart Association, Kopavogur, Iceland; The University of Iceland, Reykjavik, Iceland villi@hjarta.is Holtasmari 1, 201 Kopavogur, Iceland.

Wei Gao

Department of Cardiology, Peking University Third Hospital, Key Laboratory of Cardiovascular Molecular Biology and Regulatory Peptides, Ministry of Health, Beijing 100191, China.

Wei Zhou

Department of Computational Medicine and Bioinformatics, University of Michigan, Ann Arbor, Michigan 48109, USA.

Weihua Zhang

Department of Epidemiology and Biostatistics, School of Public Health, Imperial College London, Norfolk Place, London W2 1PG, UK.

Wouter Jukema

Department of Cardiology, Leiden University Medical Center, Leiden, The Netherlands; The Interuniversity Cardiology Institute of the Netherlands, Utrecht, The Netherlands.

Xiangfeng Lu

Department of Internal Medicine, Division of Cardiovascular Medicine, University of Michigan, Ann Arbor, MI 48109, USA. State Key Laboratory of Cardiovascular Disease, Fuwai Hospital, National Center for Cardiovascular Diseases, Chinese Academy of Medical Sciences and Peking Union Medical College, Beijing, China.

Xueling Sim

Department of Biostatistics and Center for Statistical Genetics, University of Michigan, Ann Arbor, MI 48109, USA.

Saw Swee Hock School of Public Health, National University of Singapore, Singapore, 117549, Singapore.

Y. Eugene Chen

Department of Internal Medicine, Division of Cardiovascular Medicine, University of Michigan, Ann Arbor, Michigan 48109, USA.

Yan Zhang

Department of Cardiology, Peking University First Hospital, Beijing 100034, China.

Yanhua Zhou

Department of Biostatistics, Boston University School of Public Health, Boston, MA 02118, USA.

Yii-Der Ida Chen

Institute for Translational Genomics and Population Sciences, Los Angeles BioMedical Research  
Institute at Harbor-UCLA Medical Center, Torrance, CA 90502, USA.

Yingchang Lu

The Charles Bronfman Institute for Personalized Medicine, Icahn School of Medicine at Mount  
Sinai, New York, NY 10029.

Yong Huo

Department of Cardiology, Peking University First Hospital, Beijing 100034, China.

---

### **CARDIoGRAM Exome Consortium**

Nathan O. Stitzel

Cardiovascular Division, Departments of Medicine and Genetics, and the McDonnell Genome  
Institute, Washington University School of Medicine, St. Louis, MO 63110, USA.

Aldi T. Kraja

Division of Statistical Genomics, Department of Genetics and Center for Genome Sciences and  
Systems Biology, Washington University School of Medicine, St. Louis, MO 63108, USA.

Kathleen E. Stirrups

William Harvey Research Institute, Barts and the London School of Medicine and Dentistry,  
Queen Mary University of London, London, UK. Department of Haematology, University of  
Cambridge, Cambridge, UK.

Nicholas G. D. Masca

Departments of Cardiovascular Sciences, University of Leicester, Leicester, UK. NIHR Leicester  
Cardiovascular Biomedical Research Unit, Glenfield Hospital, Leicester, UK.

Jeanette Erdmann

Institute for Integrative and Experimental Genomics, University of Lübeck, Lübeck, Germany.  
DZHK (German Center for Cardiovascular Research), partner site Hamburg/Lübeck/Kiel,  
Lübeck, Germany.

Paola G. Ferrario

DZHK (German Center for Cardiovascular Research), partner site Hamburg/Lübeck/Kiel,  
Lübeck, Germany. Institut für Medizinische Biometrie und Statistik, Universität zu Lübeck,  
Lübeck, Germany. Dr. rer. nat., Inke R. König, Dr. rer. biol. hum. DZHK (German Center for  
Cardiovascular Research), partner site Hamburg/Lübeck/Kiel, Lübeck, Germany. Institut für

Medizinische Biometrie und Statistik, Universität zu Lübeck (P.G.F., I.R.K., J. Kruppa),  
Lübeck, Germany.

Peter E. Weeke

Department of Medicine, Vanderbilt, University Medical Center, Nashville, TN 37232, USA.

The Heart Centre, Department of Cardiology, Copenhagen University Hospital, Rigshospitalet,  
Copenhagen, Denmark.

Thomas R. Webb

Departments of Cardiovascular Sciences, University of Leicester, Leicester, UK. NIHR Leicester  
Cardiovascular Biomedical Research Unit, Glenfield Hospital, Leicester, UK.

Paul L. Auer

School of Public Health, University of Wisconsin–Milwaukee, Milwaukee, WI 53201, USA.

Ursula M. Schick

Fred Hutchinson Cancer Research Center, University of Washington, Seattle, WA 98109, USA.

Charles Bronfman Institute for Personalized Medicine, Icahn School of Medicine at Mount Sinai,  
New York, NY 10029, USA.

Yingchang Lu

Genetics of Obesity and Related Metabolic Traits Program and the Charles Bronfman Institute  
for Personalized Medicine, Icahn School of Medicine at Mount Sinai, New York, NY 10029,  
USA.

He Zhang

Division of Cardiovascular Medicine, University of Michigan, Ann Arbor, Michigan 48109,  
USA.

Marie-Pierre Dubé

Département de médecine, and the Montreal Heart Institute, Montreal, Canada.

Anuj Goel

Division of Cardiovascular Medicine, Radcliffe Department of Medicine, and the Wellcome  
Trust Centre for Human Genetics, University of Oxford, Oxford, UK.

Martin Farrall

Division of Cardiovascular Medicine, Radcliffe Department of Medicine, and the Wellcome  
Trust Centre for Human Genetics, University of Oxford, Oxford, UK.

Gina M. Peloso

Center for Human Genetic Research, Massachusetts General Hospital, Boston, MA 02114, USA.  
Cardiovascular Research Center, Massachusetts General Hospital, Boston, MA 02114, USA.  
Department of Medicine, Harvard Medical School, Boston, MA 02114, USA. Program in  
Medical and Population Genetics, Broad Institute, 7 Cambridge Center, Cambridge, MA 02142,  
USA. Department of Biostatistics, Boston University School of Public Health, Boston, MA  
02118, USA.

Hong-Hee Won

Center for Human Genetic Research, Massachusetts General Hospital, Boston, MA 02114, USA.  
Cardiovascular Research Center, Massachusetts General Hospital, Boston, MA 02114, USA.  
Department of Medicine, Harvard Medical School, Boston, MA 02114, USA. Program in  
Medical and Population Genetics, Broad Institute, 7 Cambridge Center, Cambridge, MA 02142,  
USA. Samsung Advanced Institute for Health Sciences and Technology (SAIHST),  
Sungkyunkwan University, Samsung Medical Center, Seoul, South Korea.

Ron Do

Charles Bronfman Institute for Personalized Medicine, Center for Statistical Genetics and  
Institute for Genomics and Multiscale Biology, Department of Genetics and Genomic Sciences,  
Zena and Michael A. Weiner Cardiovascular Institute, Icahn School of Medicine at Mount Sinai,  
New York, NY 10029, USA.

Erik van Iperen

Department of Biostatistics, Academic Medical Center, Amsterdam, the Netherlands.

Stavroula Kanoni

William Harvey Research Institute, Barts and the London School of Medicine and Dentistry,  
Queen Mary University of London, London, UK.

Jochen Kruppa

Institut für Medizinische Biometrie und Statistik, Universität zu Lübeck, Lübeck, Germany.  
Department of Medical Statistics, University Medical Center Göttingen, Göttingen, Germany.

Anubha Mahajan

Wellcome Trust Centre for Human Genetics, Nuffield Department of Medicine, University of  
Oxford, Oxford, UK.

Robert A. Scott,

University of Cambridge, MRC Epidemiology Unit, Institute of Metabolic Science,  
Addenbrooke's Hospital, Cambridge, UK.

Christina Willenborg

Institute for Integrative and Experimental Genomics, University of Lübeck, Lübeck, Germany.  
DZHK (German Center for Cardiovascular Research), partner site Hamburg/Lübeck/Kiel,  
Lübeck, Germany.

Peter S. Braund

Departments of Cardiovascular Sciences, University of Leicester, Leicester, UK. NIHR Leicester  
Cardiovascular Biomedical Research Unit, Glenfield Hospital, Leicester, UK.

Julian C. van Capelleveen

Department of Vascular Medicine, Academic Medical Center, Amsterdam, the Netherlands.

Alex S.F. Doney

Medical Research Institute, University of Dundee, Ninewells Hospital and Medical School,  
Dundee, Scotland, UK.

Louise A. Donnelly

Medical Research Institute, University of Dundee, Ninewells Hospital and Medical School,  
Dundee, Scotland, UK.

Rosanna Asselta

Department of Biomedical Sciences, Humanitas University, and Humanitas Clinical and  
Research Center, Milan, Italy.

Piera A. Merlini

Division of Cardiology, Niguarda Hospital, Milan, Italy.

Stefano Duga

Department of Biomedical Sciences, Humanitas University, and Humanitas Clinical and  
Research Center, Milan, Italy.

Nicola Marziliano

Division of Cardiology, Azienda Ospedaliero–Uni-versitaria di Parma, Parma, Italy.

Associazione per lo Studio della Trombosi in Cardiologia, Pavia, Italy.

Josh C. Denny

Departments of Medicine and Biomedical Informatics, Vanderbilt University Medical Center,  
Nashville, TN 37232, USA.

Christian M. Shaffer

Department of Medicine, Vanderbilt University Medical Center, Nashville, TN 37232, USA.

Nour Eddine El-Mokhtari

Klinik für Innere Medizin, Kreiskrankenhaus Rendsburg, Rendsburg, Germany.

Andre Franke

Institute of Clinical Molecular Biology, Christian-Albrechts-University Kiel, Kiel, Germany.

Omri Gottesman

Charles Bronfman Institute for Personalized Medicine, Icahn School of Medicine at Mount Sinai, New York, NY 10029, USA.

Stefanie Heilmann

Institute of Human Genetics, and Department of Genomics, Life and Brain Center, University of Bonn, Bonn, Germany.

Christian Hengstenberg

Deutsches Herzzentrum München, Technische Universität München, Germany. DZHK partner site Munich Heart Alliance, Germany.

Per Hoffmann

Institute of Human Genetics and Department of Genomics, Life and Brain Center, University of Bonn, Bonn, Germany.

Oddgeir L. Holmen

HUNT Research Center, Department of Public Health and General Practice, Norwegian University of Science and Technology, Levanger, Norway. St. Olav Hospital, Trondheim University Hospital, Trondheim, Norway.

Kristian Hveem

HUNT Research Center, Department of Public Health and General Practice, Norwegian University of Science and Technology, and Department of Medicine, Levanger Hospital, Nord-Trøndelag Health Trust Norway, Levanger, Norway.

Jan-Håkan Jansson

Department of Public Health and Clinical Medicine, Research Unit Skellefteå, Umeå University, Umeå, Sweden.

Karl-Heinz Jöckel



Institute for Medical Informatics, Biometry and Epidemiology, University Hospital Essen, Essen, Germany.

Thorsten Kessler

Deutsches Herzzentrum München, Technische Universität München, Germany.

Jennifer Kriebel

Research Unit of Molecular Epidemiology, Institutes of Epidemiology II, and German Center for Diabetes Research, Neuherberg, Germany.

Karl L. Laugwitz

DZHK partner site Munich Heart Alliance, I. Medizinische Klinik und Poliklinik, Klinikum rechts der Isar der Technischen Universität München, Ludwig-Maximilians-Universität, Munich, Germany.

Eirini Marouli

William Harvey Research Institute, Barts and the London School of Medicine and Dentistry, Queen Mary University of London, London, UK.

Nicola Martinelli

Department of Medicine, Section of Internal Medicine, University of Verona, Verona, Italy.

Mark I. McCarthy

Wellcome Trust Centre for Human Genetics, and Oxford Centre for Diabetes, Endocrinology and Metabolism, University of Oxford, and Oxford National Institute for Health Research Biomedical Research Centre, Churchill Hospital, Oxford, UK.

Natalie R. Van Zuydam

Oxford Centre for Diabetes, Endocrinology and Metabolism, University of Oxford, Oxford, UK.

Christa Meisinger

Institutes of Epidemiology II, Helmholtz Zentrum München–German Research Center for Environmental Health, Neuherberg, Germany.

Tõnu Esko

Department of Genetics, Harvard Medical School, Boston, MA 02114, USA. Division of Endocrinology, Boston Children's Hospital, Boston, MA 02115, USA. Broad Institute of the Massachusetts Institute of Technology and Harvard, Cambridge, MA 02142, USA. Estonian Genome Center, University of Tartu, Tartu, Estonia.

Evelin Mihailov

Estonian Genome Center, University of Tartu, Tartu, Estonia.

Stefan A. Escher

Department of Clinical Sciences, Department of Clinical Sciences in Malmo, Lund University  
Diabetes Center, Lund University, Lund, Sweden.

Maris Alver

Estonian Genome Center, University of Tartu, Tartu, Estonia. Institute of Molecular and Cell  
Biology, Tartu, Estonia.

Susanne Moebus

Institute for Medical Informatics, Biometry and Epidemiology, University Hospital Essen, Essen,  
Germany.

Andrew D. Morris

School of Molecular, Genetic and Population Health Sciences, University of Edinburgh Medical  
School, Edinburgh, Scotland, UK.

Martina Müller-Nurasyid

Institute of Genetic Epidemiology, Helmholtz Zentrum München - German Research Center for  
Environmental Health, Neuherberg, Germany. Department of Medicine I, Ludwig-Maximilians-  
Universität, Munich, Germany. DZHK (German Centre for Cardiovascular Research), partner  
site Munich Heart Alliance, Munich, Germany.

Majid Nikpay

Ruddy Canadian Cardiovascular Genetics Centre, University of Ottawa Heart Institute, Ottawa,  
Canada.

Oliviero Olivieri

Department of Medicine, Section of Internal Medicine, University of Verona, Verona, Italy.

Louis-Philippe Lemieux Perreault

Montreal Heart Institute, Montreal, Canada.

Alaa AlQarawi

King Abdulaziz University, Jeddah, Saudi Arabia.

Neil R. Robertson

Wellcome Trust Centre for Human Genetics, and Oxford Centre for Diabetes, Endocrinology  
and Metabolism, University of Oxford, Oxford, UK.

Karen O. Akinsanya

Merck Sharp & Dohme, Rahway, NJ 07065, USA.

Dermot F. Reilly

Merck Sharp & Dohme, Rahway, NJ 07065, USA.

Thomas F. Vogt

Merck Sharp & Dohme, Rahway, NJ 07065, USA.

Wu Yin

Merck Sharp & Dohme, Rahway, NJ 07065, USA.

Folkert W. Asselbergs

Institute of Cardiovascular Science, Faculty of Population Health Sciences, University College London, London, UK.

ICIN-Netherlands Heart Institute, Utrecht, the Netherlands.

Charles Kooperberg

Fred Hutchinson Cancer Research Center, University of Washington, Seattle, WA 98109, USA.

Rebecca D. Jackson

Division of Endocrinology, Diabetes, and Metabolism, Department of Medicine, Ohio State University, Columbus, OH 43210, USA.

Eli Stahl

Department of Psychiatry, Icahn School of Medicine at Mount Sinai, New York, NY 10029, USA.

Konstantin Strauch

Institute for Medical Informatics, Biometry and Epidemiology, Chair of Genetic Epidemiology, Ludwig-Maximilians-Universität, Munich, Germany. Institute for Genetic Epidemiology (M.M.-N., K.S.), Helmholtz Zentrum München–German Research Center for Environmental Health, Neuherberg, Germany.

Tibor V. Varga

Department of Clinical Sciences, Lund University Diabetes Center, Lund University, Lund, Sweden.

Melanie Waldenberger

Research Unit of Molecular Epidemiology and Institute of Epidemiology II, Helmholtz Zentrum München–German Research Center for Environmental Health, and German Center for Diabetes Research, Neuherberg, Germany.

Lingyao Zeng

Deutsches Herzzentrum München, Technische Universität München, Germany.

Chunyu Liu

Framingham Heart Study, Framingham, MA 01702, USA.

Population Sciences Branch, National Heart, Lung, and Blood Institute, Bethesda, MD 20892, USA.

Georg B. Ehret

Cardiology Division, Department of Medicine, Geneva University Hospital, Geneva, Switzerland.

Center for Complex Disease Genomics, McKusick–Nathans Institute of Genetic Medicine, Johns Hopkins University School of Medicine, Baltimore, MD 21205, USA.

Christopher Newton-Cheh

Center for Human Genetic Research, Massachusetts General Hospital, Boston, MA 02114, USA.

Cardiovascular Research Center, Massachusetts General Hospital, Boston, MA 02114, USA.

Department of Medicine, Harvard Medical School, Boston, MA 02114, USA. Program in Medical and Population Genetics, Broad Institute, 7 Cambridge Center, Cambridge, MA 02142, USA.

Daniel I. Chasman

Division of Preventive Medicine, Department of Medicine, Brigham and Women's Hospital and Harvard Medical School, Boston, MA 02215, USA.

Rajiv Chowdhury

Cardiovascular Epidemiology Unit, Department of Public Health and Primary Care, University of Cambridge, Cambridge, UK.

Marco Ferrario

Research Centre in Epidemiology and Preventive Medicine – EPIMED, Department of Clinical and Experimental Medicine, University of Insubria, Via O Rossi 9, 21100 Varese, Italy.

Ian Ford

Robertson Centre for Biostatistics, University of Glasgow, Glasgow, UK.

J. Wouter Jukema

Department of Cardiology, Leiden University Medical Center, Leiden, The Netherlands; The Interuniversity Cardiology Institute of the Netherlands, Utrecht, The Netherlands.

Frank Kee

Director, UKCRC Centre of Excellence for Public Health, Queens University, Belfast, Northern Ireland.

Kari Kuulasmaa

Department of Health, National Institute for Health and Welfare, FI-00271, Helsinki, Finland.

Børge G. Nordestgaard

Department of Clinical Biochemistry and The Copenhagen General Population Study, Herlev and Gentofte Hospital, Copenhagen University Hospital, Denmark, and Faculty of Health and Medical Sciences, University of Denmark, Denmark.

Markus Perola

Department of Health, National Institute for Health and Welfare, FI-00271, Helsinki, Finland.  
Institute of Molecular Medicine FIMM, University of Helsinki, Finland.

Danish Saleheen

Department of Biostatistics and Epidemiology, Perelman School of Medicine, University of Pennsylvania, Philadelphia, PA 19104, USA. Centre for Non-Communicable Diseases, Karachi, Pakistan. Cardiovascular Epidemiology Unit, Department of Public Health and Primary Care, University of Cambridge, Cambridge, UK.

Naveed Sattar

University of Glasgow, Glasgow, UK.

Neil Poulter

International Centre for Circulatory Health, Imperial College London, W2 1PG, UK.

Praveen Surendran

Cardiovascular Epidemiology Unit, Department of Public Health and Primary Care, University of Cambridge, Cambridge, UK.

David Tregouet

Sorbonne Université, UPMC Univ Paris 06, ICAN Institute for Cardiometabolism and Nutrition, Paris, France.

Robin Young

Cardiovascular Epidemiology Unit, Department of Public Health and Primary Care, University of Cambridge, Cambridge, UK.

Joanna M.M. Howson

Cardiovascular Epidemiology Unit, Department of Public Health and Primary Care, University of Cambridge, Cambridge, UK.

Adam S. Butterworth

Cardiovascular Epidemiology Unit, Department of Public Health and Primary Care, University of Cambridge, Cambridge, UK. The National Institute for Health Research Blood and Transplant Unit (NIHR BTRU) in Donor Health and Genomics at the University of Cambridge, UK.

John Danesh

Cardiovascular Epidemiology Unit, Department of Public Health and Primary Care, University of Cambridge, Cambridge, UK. The National Institute for Health Research Blood and Transplant Unit (NIHR BTRU) in Donor Health and Genomics at the University of Cambridge, UK.

Wellcome Trust Sanger Institute, Genome Campus, Hinxton CB10 1HH, UK.

Diego Ardissino

Division of Cardiology, Azienda Ospedaliero–Universitaria di Parma, Parma, Italy.

Associazione per lo Studio della Trombosi in Cardiologia, Pavia, Italy.

Erwin P. Bottinger

The Charles Bronfman Institute for Personalized Medicine, Icahn School of Medicine at Mount Sinai, New York, NY 10029, USA.

Raimund Erbel

Institute for Medical Informatics, Biometry and Epidemiology, University Hospital Essen, Essen, Germany.

Paul W. Franks

Department of Clinical Sciences, Genetic and Molecular Epidemiology Unit, Lund University, Malmö, Sweden. Department of Nutrition, Harvard T. H. Chan School of Public Health, Boston, MA 02115, USA. Department of Public Health & Clinical Medicine, Umeå University, Umeå, Sweden.

Domenico Girelli

Department of Medicine, Section of Internal Medicine, University of Verona, Verona, Italy.

Alistair S. Hall

Leeds Institute of Genetics, Health and Therapeutics, University of Leeds, Leeds, UK.

G. Kees Hovingh

Department of Vascular Medicine, Academic Medical Center, Amsterdam, the Netherlands.

Adnan Kastrati

Deutsches Herzzentrum München, Technische Universität München, Germany.

Wolfgang Lieb

Institute of Epidemiology and Biobank popgen (W.L.), Christian-Albrechts-University Kiel, Kiel, Germany.

Thomas Meitinger

Institute of Human Genetics (T.M.), Technische Universität München, Germany. DZHK partner site Munich Heart Alliance (C.H., K.L.L., M.M.-N., T.M., A.P., H.S.), I. Medizinische Klinik und Poliklinik, Klinikum rechts der Isar der Technischen Universität München, Germany.

Institute of Human Genetics, Helmholtz Zentrum München–German Research Center for Environmental Health, Neuherberg, Germany.

William E. Kraus

Duke Molecular Physiology Institute and Division of Cardiology, Department of Medicine, Duke University, Durham, NC 27710, USA.

Svati H. Shah

Duke Molecular Physiology Institute and Division of Cardiology, Department of Medicine, Duke University, Durham, NC 27710, USA.

Ruth McPherson

Ruddy Canadian Cardiovascular Genetics Centre, University of Ottawa Heart Institute, Ottawa, Canada.

Marju Orho-Melander

Department of Clinical Sciences in Malmo, Lund University Diabetes Center, Lund University, Clinical Research Center, Skåne University Hospital, Malmo, Sweden.

Olle Melander

Department of Clinical Sciences in Malmo, Lund University Diabetes Center, Lund University, Clinical Research Center, Skåne University Hospital, Malmo, Sweden.

Andres Metspalu

Estonian Genome Center, University of Tartu, and Institute of Molecular and Cell Biology, Tartu, Estonia.

Colin N.A. Palmer

Medical Research Institute, University of Dundee, Ninewells Hospital and Medical School, Dundee, UK.

Annette Peters

Institute for Epidemiology II, Helmholtz Zentrum München, Neuherberg, Germany.

German Center for Cardiovascular Disease Research, partner-site Munich, Munich, Germany.

German Center for Diabetes Research, Neuherberg, Germany.

Daniel J. Rader

Departments of Medicine and Genetics and the Cardiovascular Institute, Perelman School of Medicine, University of Pennsylvania, Philadelphia, PA 19104, USA.

Muredach P. Reilly

Cardiovascular Institute, Perelman School of Medicine, University of Pennsylvania, Philadelphia, PA 19104, USA.

Ruth J.F. Loos, Ph.D.,

The Charles Bronfman Institute for Personalized Medicine, Icahn School of Medicine at Mount Sinai, New York, NY 10029, USA.

The Mindich Child Health and Development Institute, Ichan School of Medicine at Mount Sinai, New York, NY 10029, USA.

Alex P. Reiner

Department of Epidemiology, University of Washington, Seattle WA 98195, USA. Division of Public Health Sciences, Fred Hutchinson Cancer Research Center, Seattle WA 98195, USA.

Dan M. Roden

Department of Medicine, Vanderbilt University Medical Center, Nashville, TN 37232, USA.

Jean-Claude Tardif

Montreal Heart Institute, Montreal, Quebec, Canada. Université de Montréal, Montreal, Quebec, Canada.

John R. Thompson

Departments of Cardiovascular Sciences and Health Sciences, University of Leicester, and NIHR Leicester Cardiovascular Biomedical Research Unit, Glenfield Hospital Leicester, UK.

Nicholas J. Wareham

University of Cambridge, MRC Epidemiology Unit, Institute of Metabolic Science, Addenbrooke's Hospital, Cambridge, UK.



Hugh Watkins

Division of Cardiovascular Medicine, Radcliffe Department of Medicine, and the Wellcome Trust Centre for Human Genetics, University of Oxford, Oxford, UK.

Cristen J. Willer

Department of Internal Medicine, Division of Cardiovascular Medicine, University of Michigan, Ann Arbor, Michigan 48109, USA.

Department of Computational Medicine and Bioinformatics, University of Michigan, Ann Arbor, Michigan 48109, USA. Department of Human Genetics, University of Michigan, Ann Arbor, Michigan 48109, USA.

Panos Deloukas

William Harvey Research Institute, Barts and The London School of Medicine and Dentistry, Queen Mary University of London, London, UK. Princess Al-Jawhara Al-Brahim Centre of Excellence in Research of Hereditary Disorders (PACER-HD), King Abdulaziz University, Jeddah 21589, Saudi Arabia.

Nilesh J. Samani

Department of Cardiovascular Sciences, University of Leicester, UK. NIHR Leicester Cardiovascular Biomedical Research Unit, Glenfield Hospital, UK. BHF Cardiovascular Research Centre, Glenfield Hospital, Leicester, LE3 9QP, UK.

Heribert Schunkert

Deutsches Herzzentrum München, Technische Universität München, Germany. DZHK partner site Munich Heart Alliance, Ludwig-Maximilians-Universität, Munich, Germany.

Sekar Kathiresan

Center for Human Genetic Research, Massachusetts General Hospital, Boston, MA 02114, USA. Cardiovascular Research Center, Massachusetts General Hospital, Boston, MA 02114, USA. Department of Medicine, Harvard Medical School, Boston, MA 02114, USA. Program in Medical and Population Genetics, Broad Institute, 7 Cambridge Center, Cambridge, MA 02142, USA.

## Materials and Methods

### *Subject Identification and Ascertainment*

Individuals with high HDL-C levels above the 95<sup>th</sup> percentile for age and sex were systematically recruited. For this study 341 individuals of European ancestry with HDL-C > 95<sup>th</sup> percentile were selected for targeted sequencing, as were 407 individuals of European ancestry with low HDL-C levels below the 25<sup>th</sup> percentile for age and sex. Briefly, using customized hybrid capture (Agilent) baits, we targeted and enriched for sequencing the exons of the ~990 genes located within 300 kb of each of the 95 loci with significant associations ( $P < 5 \times 10^{-8}$ ) with plasma lipid levels identified by the Global Lipids Genetics Consortium as of 2010 (22). We performed next-generation sequencing using Illumina Genome Analyzers at the Broad Institute as described previously (40). Base pairs were called and sequencing reads were aligned to the human genome reference GRCh37 (hg19), and sequencing metrics were processed using the Picard pipeline with an output of Binary Alignment Map (BAM) files.

The Genome Analysis Toolkit Unified Genotyper was used to genotype all variant sites, calculate initial quality control metrics, and filter based on these values, and variants were annotated using SnpEFF (41). Variants were indexed per sample in Variant Call Format (VCF) files. Genotypes for each individual were computed at each site and tabulated.

Additionally, *SCARB1* mutation carriers were identified by genotyping subjects with high vs. low HDL-C using the Exome Chip (HumanExome BeadChip v1.0, Illumina, Inc., San Diego, CA). The Exome Chip contains >240,000 coding SNPs derived from all mutations found >2 times across >1 data set among 23 separate data sets comprising a total of >12,000 individual exome and whole genome sequences. The P376L variant is included. In total, 353 high HDL-C males (HDL-C  $\geq$  70 mg/dL), 747 high HDL-C females (HDL-C  $\geq$  80 mg/dL), 1106 low HDL-C males (HDL-C  $\leq$  40 mg/dL), and 573 low HDL-C females (HDL-C  $\leq$  50 mg/dL) were genotyped using the Exome Chip. Subject samples were drawn from previous research studies conducted in our laboratory. After removing subjects from analysis for which demographic covariates were not available, there remained 805 subjects with high HDL-C and 989 subjects with low HDL-C analyzed for association of *SCARB1* P376L allele frequency with HDL-C.

To confirm the presence of the P376L mutation in carriers, a nearby region of 995 bp of *SCARB1* was amplified by PCR using the following primers: forward: TGGTTTGGTTGGTCAGTGGCG, reverse: AGGGCTGCCTCCAGCTCACAT; and the

following PCR conditions: 95°C, 2 min; (95°C, 30 s; 62.6°C, 30 s; 72°C; 100.0 s) repeat 29 times; 72°C, 5 min; 4°C forever. PCR products were purified using a QIAquick PCR Purification Kit (Qiagen, Germantown, MD, USA) and sequenced by Sanger sequencing (42) by Genewiz Inc (South Plainfield, NJ, USA). Sequences were compared with *SCARBI* NCBI reference sequence NG\_028199.1 using Sequencher (Gene Codes, Ann Arbor, MI, USA).

### ***In silico analysis***

To predict the effect of the P376L mutation on SR-BI protein structure and function we used the publicly available algorithms Condel and Raptor X (43-46). Condel generated a “consensus deleteriousness” score, obtained by combining 3 prediction algorithms (PolyPhen-2, MutationAssessor, and SIFT). Raptor X was used to predict effects on local secondary structure of the SR-BI due to the P376L variant. Protein alignment data were generated by MacVector (MacVector, Inc., Cary, NC) using a Gonnet similarity matrix with open gap penalty = 10 and extended gap penalty = 0.1.

### ***DNA cloning and adeno-associated virus generation***

The coding sequence of SR-BI (CCDS 9259.1) was obtained from Thermo Scientific (cDNA clone MGC:120767 IMAGE:7939577) in a pCR4-TOPO cloning vector (Invitrogen). The P376L and the P297S mutations were inserted in the sequence by site directed mutagenesis using the Quickchange II site directed mutagenesis kit (Agilent technologies) and following primers:

P376L-F 5'-cctggacatccacctgggtcacgggaatcc-3'

P376L-R 5'-ggattcccgtgaccaggtggatgtccagg-3'

P297S-F 5'-gggtttgaaggcatctccacatcgcttcgt-3'

P297S-R 5'-acgaagcgataggtggagatgccttcaaacc-3'

The wild type and the mutated coding sequences were then amplified by PCR and subcloned into a pcDNA3.1/V5-His TOPO expression plasmid (Invitrogen) according to manufacturer's instructions. For *in vivo* studies, *SCARBI* WT and P376L cDNA sequences were amplified by PCR using the following primers containing KpnI and NotI sites, and then subcloned by KpnI/NotI double digestion followed by ligation into adeno-associated virus serotype 8 vector (AAV8) containing the liver-specific thyroxine-binding globulin (TBG) promoter provided by the University of Pennsylvania Vector Core (47-52). Virus production, purification and quantification were carried out by the core facility.

### ***Radioactive labeling of HDL***

Total human HDL ( $1.063 < d < 1.21$  g/ml) and HDL<sub>3</sub> ( $1.125 < d < 1.21$  g/ml) were obtained by sequential ultracentrifugation as described before (53). HDL was labeled with <sup>125</sup>I by a modification of the iodine monochloride method for the binding experiment at 4°C and they were labeled with <sup>125</sup>I-tyramine-cellobiose (<sup>125</sup>I-TCB) for all the other experiments (54). To further label <sup>125</sup>I-TCB-HDL with <sup>3</sup>H-cholesteryl-ether (<sup>3</sup>H-CE), 500 µCi of <sup>3</sup>H-CE resuspended in 50 µl of ethanol were added to a solution containing heat-inactivated human lipoprotein deficient serum (200 mg protein) and iodinated HDL (6 mg protein). The solution was incubated overnight at 37°C with gentle shaking, followed by reisolation of the dual-labeled HDL by sequential ultracentrifugation.

### ***Cell culture and in vitro assays***

COS7 cells were cultured in Dulbecco modified Eagle medium (DMEM) supplemented with 10% fetal bovine serum at 37°C in a humidified 5% CO<sub>2</sub> incubator and were passaged using trypsin. For selective cholesterol uptake COS7 cells were plated at a density of  $3 \times 10^4$  cells/cm<sup>2</sup> in 6 well plates. One day following plating (Day 1), cells were transfected using Lipofectamine 2000 (4 µg DNA/well, 3:1 Lipofectamine:DNA ratio) with a pcDNA3.1/V5-His-TOPO plasmid encoding either *SCARB1* WT, *SCARB1* P376L, or *SCARB1* P297S cDNAs. One group received a mock transfection with plasmid containing no cDNA. Each experimental group was tested in quintuplicate. On Day 2, culture medium was changed to DMEM 0.5% BSA containing 20 µg/ml of <sup>3</sup>H-cholesteryl hexadecyl ether/<sup>125</sup>I-TCB-labeled HDL<sub>3</sub> and incubated for 3 hours at 37°C. In one well per plate a 40-fold excess of nonradiolabeled (“cold”) HDL was added to a final concentration of 800 µg/ml. After incubation cells were washed with PBS and lipids were extracted in two consecutive steps using a 3:2 hexane-isopropanol mixture. After drying, proteins were solubilized using 2 ml of 0.1N NaOH. The hexane/isopropanol fraction was dried under nitrogen, resuspended in 600 µl of toluene, and counted separately in scintillation and gamma counters. The NaOH fraction was counted in the gamma counter and measured for protein concentration using a Lowry protein assay (55). Counts from wells with 40-fold excess of cold HDL (non receptor-specific counts) were subtracted from counts from other wells to calculate the receptor-specific activity internalized. Data analysis was performed as previously described (56), with the following modification: <sup>125</sup>I activity (counts per minute) in the NaOH fraction were considered as cell-surface associated lipoproteins (it has been shown previously that when

performing this experiment under similar conditions, the fraction of cell associated counts that is trichloroacetic acid-soluble is approximately 5%) (57). A negligible amount of  $^{125}\text{I}$  counts were found in the hexane-isopropanol fraction. SR-BI protein expression was determined by western blotting. 10  $\mu\text{g}$  of protein from cellular lysates determined by Lowry assay from each sample was loaded in NuPAGE gels (Life Technologies) using denaturing and reducing conditions for one-dimensional SDS-PAGE using MOPS running buffer. Proteins were separated by electrophoresis for approx. 1 hour, transferred to nitrocellulose membranes, blocked for 2 hours at room temperature using 5% fat-free milk in PBS (0.05% tween 20). Membranes were then incubated with anti-SR-BI antibody (NB400-131, Novus, 1:500 dilution in 5% milk-PBS-tween) at room temperature for 1 hour, washed three times with PBS-tween, and then with anti-goat IgG-HRP conjugate (700-035-147, Jackson ImmunoResearch, 1:2500 dilution in 5% milk-PBS-tween) at room temperature for 1 hour. Proteins were visualized after washing again after secondary antibody incubation using Luminata Crescendo chemiluminescent agent (Millipore). Films were incubated with membranes after chemiluminescent reagent in the dark typically for 30 s, 1 min, 2 min, and 5 min exposures for each membrane. Human  $\beta$ -actin was used as a loading control and was visualized after incubation with mouse anti-actin primary antibody (sc-81178, Santa Cruz, 1:20 dilution in 5% milk-PBS-tween) and then goat anti-mouse IgG HRP (sc-2302, Santa Cruz, 1:1000 in 5% milk-PBS-tween).

The binding of  $^{125}\text{I}$ -HDL<sub>3</sub> at 4°C to COS7 cells was measured using a modification of the method from Nieland *et al* (58). Briefly, COS7 cells were seeded at a concentration of  $3 \times 10^4$  cells/cm<sup>2</sup> in 12 well plates. The next day, cells were transfected using Lipofectamine 2000 (1.6  $\mu\text{g}$  DNA/well, 3:1 Lipofectamine:DNA ratio) with a pcDNA3.1/V5-His-TOPO plasmid encoding either *SCARB1* WT, *SCARB1* P376L, or *SCARB1* P297S cDNAs. An additional plate of cells was transfected with a plasmid encoding GFP (pAAV-CB-EGFP), which was used as a control. On the following day, cell plates were precooled for 30 min on ice, washed with cold DMEM and then exposed for 2 hours to the assay medium (DMEM, 1% P/S, 0.5%BSA + lipoproteins) at 4°C. After the incubation, cells were washed twice with ice-cold PBS containing 2 mg/ml of bovine serum albumin (BSA) and a third time with PBS without BSA. Cells were then lysed in 0.1N NaOH. Lysates were used for  $^{125}\text{I}$  counting and for measuring protein content using a Lowry assay. In parallel to this, cells were seeded in 10 cm plates, transfected as

described above and lysed after 24 hours in RIPA buffer to check SR-BI protein expression by immunoblotting for SR-BI as described above using 10 µg of protein from cellular lysates.

### ***Cell surface biotinylation assay***

COS7 cells were seeded and transfected as described above in 175 cm<sup>2</sup> flasks. Twenty-four hours after transfection, cell-surface-associated proteins were isolated using the Pierce Cell Surface Protein Isolation Kit (Pierce Biotechnology Inc., Rockford, IL) according to the manufacturer's instructions. After lysis, protein concentration was determined by bicinchoninic acid (BCA) assay and the same amount of proteins was loaded on NeutrAvidin Agarose beads to isolate biotinylated proteins. After multiple washing steps, proteins were eluted from the beads and loaded on a 10% Bis-Tris polyacrylamide gels for western blotting. Blots for β-actin and Na<sup>+</sup>/K<sup>+</sup>-ATPase were used as intracellular and surface-associated controls, respectively.

We generated induced pluripotent stem cells (iPSC) from peripheral blood mononuclear cells (PBMCs) and differentiated them into hepatocyte-like cells as described elsewhere (24-26, 59, 60) After complete differentiation of iPSCs to hepatocyte-like cells (approx. 20–22 days from initiation of differentiation), we performed selective cholesterol uptake as described above.

For Endoglycosidase H sensitivity assays, 100 µg of liver homogenates from mice transduced with human *SCARB1* or Null AAV8 vectors were treated with Endoglycosidase H (New England Biolabs, Ipswich, MA), Sialidase A, or a combination of Sialidase A and PNGase F (Prozyme, Hayward, CA) according to manufacturer's instructions. 30 µg of digestion products were then loaded on a 10% Bis-Tris polyacrylamide gel for western blotting as described above. Non-treated homogenates were used as controls. Endoglycosidase H sensitivity assays were also performed using lysates from transfected COS7 cells (10 µg each lysate) and from iPSC-derived hepatocyte-like cells (50 µg each lysate). In these experiments, cell lysate in RIPA buffer plus Complete Protease Inhibitor Cocktail (Roche) was used.

### ***AAV-mediated overexpression of SCARB1 WT and P376L in Scarb1 KO mice***

AAV serotype 8 vectors expressing *SCARB1* WT or P376L were expressed in *Scarb1* KO mice, which were subsequently studied for effects on lipoprotein metabolism. Male *Scarb1* KO mice (6 per group) were weighed, bled through retro-orbital bleeding and injected with  $10^{12}$  genome copies (GC) of AAV-*SCARB1*-WT, AAV-*SCARB1*-P376L, or Null vector via intraperitoneal injection. Mice were fasted for 5 hours, weighed, and bled again at 12 days after injection. Plasma lipid levels were determined as described above. At 2 weeks after injection, HDL kinetics using radiolabeled human HDL was measured (61). Briefly, mice were injected via tail-vein injection with a mixture of  $^{125}\text{I}$ -tyramine-cellobiose-HDL ( $3 \times 10^6$  cpm/mouse) and  $^3\text{H}$ -cholesteryl-ether (CE)-HDL ( $3 \times 10^6$  cpm/mouse) and bled at 2 min post-injection and 1, 3, 6, 9, and 24 hours. Plasma  $^3\text{H}$  and  $^{125}\text{I}$  activity at each time point were determined by using scintillation counting and gamma counting, respectively. At 24 hours post-injection of radiolabeled HDLs, mice were weighed, anesthetized, terminally bled, and sacrificed. Livers were lysed in phosphate buffered saline (PBS), and  $^3\text{H}$  and  $^{125}\text{I}$  were counted in the lysates to determine liver-associated counts. Liver-associated counts were then expressed as micrograms of HDL component/mg of liver to allow a direct comparison between liver associated  $^3\text{H}$  and  $^{125}\text{I}$  counts. Selective cholesterol uptake was calculated as the difference between liver-associated  $^3\text{H}$  counts and liver associated  $^{125}\text{I}$  counts expressed as micrograms of HDL component/mg of liver. SR-BI protein expression levels in liver homogenates were determined by western blot as described above using 30  $\mu\text{g}$  of protein from tissue lysates followed by densitometric analysis performed with ImageJ (U.S. National Institutes of Health, Bethesda, MD) (62).

### ***Subject selection and study visit***

Carriers of the P376L variant identified through next-generation sequencing were recruited through a comprehensive recall protocol approved by the institutional review board of the Perelman School of Medicine at the University of Pennsylvania, Philadelphia. Additionally, control subjects were chosen from a database of previous participants in studies conducted in our laboratory. All subjects recruited gave informed consent. Two groups of controls were selected: those having HDL-C levels between the 25<sup>th</sup> and the 75<sup>th</sup> percentile for age and sex (normal HDL-C control group) and those with HDL-C levels greater than the 75<sup>th</sup> percentile for age and sex but confirmed to lack the P376L variant (high HDL-C control group). The two control groups were selected to match on aggregate the age, gender and race of the carrier group. Study

visits were performed in the Clinical and Translational Research Center (CTRC) facility at the Perelman School of Medicine at the University of Pennsylvania. Venous blood after overnight fasting was drawn from each subject to measure a comprehensive metabolic panel, complete blood count, standard urinalysis, reticulocyte count, T- and B-cell counts, antinuclear antibody screen, anti double-stranded DNA antibody screen, and anti-neutrophil cytoplasmic antibody screen, which were measured by the William Pepper Laboratory of the Hospital of the University of Pennsylvania. A comprehensive lipid panel {total cholesterol [TC], VLDL cholesterol [VLDL-C], LDL cholesterol [LDL-C], HDL-C, triglycerides [TG], lipoprotein(a) [Lp(a)], and apolipoproteins A-I, A-II, C-II, C-III, and E [ApoA-1, ApoA-II, ApoC-II, ApoC-III, ApoE]} was also performed by the Lipid Research Laboratory of the Hospital of the University of Pennsylvania per standard protocols as described previously (63). HDL-C and LDL-C levels were measured both directly and after precipitation with phosphotungstic acid (PTA). Lipoproteins were separated by fast protein liquid chromatography on a Superose 6 column as described previously (64).

Blood was also collected in BD Vacutainer CPT Cell Preparation tubes (BD, Franklin Lakes, NJ, USA) for PBMC isolation and storage and in sodium citrate tubes for platelet isolation and testing. Platelet aggregation studies (PAS) were performed at the Translational Core Laboratory (TCL) using a photometric aggregometer (Biodata Corp, Horsham, PA).

To induce platelet aggregation the following stimuli were used at the concentrations reported in brackets: arachidonic acid (200, 250, 300, 400, 500 mg/ml), collagen (0.04, 0.08, 0.12, 0.16, 0.2 mg/ml), ADP (0.625, 1.25, 2.5, 5, 10 mM), TRAP (1, 2, 3, 4, 5  $\mu$ M). Arachidonic acid, collagen, and ADP were obtained from Biodata Corp. (Horsham, PA); TRAP was obtained from Sigma Chemical Corp (St. Louis, MO). To correct for possibly unreported intake of drugs with antiaggregant action, subjects whose platelets failed to reach 95% aggregation with 500 mg/ml of arachidonic acid were excluded from the analysis. Additional blood was also drawn and frozen for later batch measurement of adrenocorticotrophic hormone (ACTH), cortisol, estradiol, progesterone, luteinizing hormone (LH), follicle-stimulating hormone (FSH), and testosterone also by the TCL using standard radioimmunoassay methods (“Coat-A-Count”) from SIEMENS Healthcare Diagnostics. Subjects taking exogenous steroids were excluded from the analysis. Study subjects were also given the option of performing a 24-hour urine collection according to standard methods the day before their visit or on a later date. Collected urine was



frozen in single-use aliquots for batch measurement of cortisol by the Translational Core Laboratory as per standard protocols. The acquisition of carotid intima-media thickness (IMT) ultrasound images was performed according to a standardized protocol, adopted from the Atherosclerosis Risk in Communities (ARIC) study (65) and as per American Society of Echocardiography and Society for Vascular Medicine Guidelines for IMT analysis (66). The scanner used was a Siemens Sequoia (Mountain View, CA, USA) with a 9 Linear probe and a custom designed carotid IMT preset. One heterozygous subject who was unable to travel to the study site had blood drawn locally. These samples were shipped to the study site for the lipid panel and autoimmune tests; the subject also sent the results of a recent comprehensive metabolic panel and complete blood count. Data from clinical phenotyping studies were collected and managed using REDCap (Research Electronic Data Capture) electronic data capture tools hosted at the Perelman School of Medicine at the University of Pennsylvania (67).

#### ***Platelet separation and cholesterol measurement***

Approximately 4.5 ml of blood was drawn from each subject into tubes containing 25 g sodium citrate, 8 g citric acid and 500 ml H<sub>2</sub>O<sub>2</sub>. Tubes were centrifuged using a tabletop centrifuge at 200xg for 15 min. at room temperature. Platelet-rich plasma (PRP) was collected as supernatant from this spin and was centrifuged at 900g for 5 min. The pellet from this spin was resuspended in 8 ml 1xPBS and centrifuged again at 900g for 5 min. Platelet pellets were collected and resuspended in 200 µl 1 × PBS and stored at –20°C. For measurement of cholesterol, platelet extracts were dried using a centrifugal evaporator (Genevac). D7-cholesterol (Cat. No. 700041; Avanti Polar Lipids, Inc.) was added to each sample as an internal standard. Lipids were extracted by addition of 1 ml chloroform:methanol (2:1) at 4°C for 2 hours. The nonpolar phase from the platelet extracts was collected and dried through centrifugal evaporation along with cholesterol standards (1.0–100.0 nmol) containing equivalent amounts of D7-cholesterol internal standard. All samples were derivatized using pentafluorobenzoyl chloride and extracted with petroleum ether before measurement by gas chromatography-mass spectrometry using negative chemical ionization. Peak areas for cholesterol and D7-cholesterol from platelet extracts were compared to that from the standard curve generated from cholesterol standards to yield cholesterol content in each sample. For platelet protein measurement, aqueous extracts from chloroform:methanol extraction of platelet samples were spun to remove excess methanol and dried using centrifugal evaporation and then resuspended in 200 µl RIPA buffer

containing 0.1 N NaOH and heated at 55°C for approximately 24 hours with periodic vortexing. Protein concentrations from these extracts were measured by a Lowry assay (55) (Pierce). Cholesterol measurements for each sample were then normalized to the corresponding protein concentrations.

### ***Fractionation of plasma lipoproteins from study subjects***

VLDL, LDL, and HDL subfractions were isolated from EDTA plasma by single step, isopycnic non-denaturing density gradient ultracentrifugation based on a modification of the method developed by Chapman et al. as previously described(68, 69). Using this procedure, five subfractions of LDL (LDL<sub>1</sub>, d 1.019–1.023 g/ml; LDL<sub>2</sub>, d 1.023–1.029 g/ml; LDL<sub>3</sub>, d 1.029–1.039 g/ml; LDL<sub>4</sub>, d 1.039–1.050 g/ml; and LDL<sub>5</sub>, d 1.050–1.063 g/ml) were isolated, followed by two subfractions of large, light HDL<sub>2</sub> (HDL<sub>2b</sub>, d 1.063–1.087 g/ml and HDL<sub>2a</sub>, d 1.088–1.110 g/ml), and three subfractions of small, dense HDL<sub>3</sub> (HDL<sub>3a</sub>, d 1.110–1.129 g/ml; HDL<sub>3b</sub>, d 1.129–1.154 g/ml; and HDL<sub>3c</sub>, d 1.154–1.170 g/ml). Total HDL was prepared as a mixture of HDL<sub>2b</sub>, 2a, 3a, 3b and 3c subfractions at their equivalent plasma concentrations.

### ***Protein quantification and chemical composition of HDL***

Overall chemical composition of HDL subfractions was assessed using commercially available enzymatic kits (total protein: Thermo Scientific, Villebon-sur-Yvette, France; total cholesterol, free cholesterol, phospholipids: DiaSys, Holzheim, Germany; triglycerides: Biomérieux, Marcy l'Etoile, France). Cholesteryl ester (CE) concentration was calculated by multiplying the difference between total and free cholesterol concentrations by 1.67. Total lipoprotein mass was calculated as the sum of total protein, CE, FC, PL and TG and expressed as plasma concentrations (mg/dl). HDL apolipoproteins (ApoA-I, ApoA-II, ApoC-III) were quantified using automated enzymatic methods (Konelab, Thermo Scientific, Waltham, MA, USA).

### ***Cellular cholesterol efflux capacity of HDL***

The cholesterol efflux capacity of total HDL was assessed in a human THP-1 monocytic cell line (ATCC, Manassas, VA, USA) as previously reported(70). THP-1 monocytes were cultured at 37°C and 5% CO<sub>2</sub> in RPMI 1640 media with 10% FBS, 2 mM glutamine, 100 µg/ml penicillin, and 100 µg/ml streptomycin (complete media) using standard cell culture procedures and differentiated into macrophage-like cells using 50 ng/ml phorbol 12-myristate 13-acetate (PMA). Cells were loaded for 24 h with [<sup>3</sup>H] cholesterol-labeled acetylated LDL (acLDL, 1

$\mu\text{Ci/ml}$ ) in serum-free RPMI 1640 culture medium supplemented with 50 mM glucose, 2 mM glutamine, 0.2% BSA, 100  $\mu\text{g/ml}$  penicillin and 100  $\mu\text{g/ml}$  streptomycin (serum-free media). After equilibration in serum-free media, cells were incubated for 4 h with HDL from subjects. Efflux capacity was normalized to HDL-phospholipid content because PL has been shown to represent the key component in determining cholesterol efflux capacity of HDL (15  $\mu\text{g/ml}$  HDL-PL in serum-free media, total volume 250  $\mu\text{L}$ ) (27). Cholesterol efflux capacity was measured as the percent of radioactivity counts in the media over counts in the cell lysate, after adjustment for non-specific diffusion to non-HDL containing media.

### ***Statistical analysis***

Data analysis was conducted using Excel (Microsoft Corp.) and GraphPad Prism 6.0 (GraphPad Software Inc.). *In vitro* and *in vivo* data were compared by Student's unpaired T-test. A p-value of less than 0.05 was considered statistically significant. The same test was employed to compare HDL subclasses and composition between controls and heterozygotes. For data regarding clinical samples, Chi-square testing (for categorical variables) and one-way ANOVA (for continuous variables) were used to determine the effect of *SCARB1* P376L carrier status on a number of variables. A P value less than 0.05 was considered statistically significant. Tukey's multiple comparison test ( $\alpha=0.05$ ) was used following ANOVA where appropriate to determine which groups were responsible for statistically significant differences among groups. Data are reported as mean  $\pm$  SD. The association of P376L and CHD was tested among CHD cases and controls of European ancestry assembled from the CARDIoGRAM Exome Consortium and the CHD Exome+ Consortium. The summary OR of CHD for P376L carriers was calculated using a Mantel-Haenszel fixed-effects meta-analysis without continuity correction, a method that is well suited to low (and even zero) counts and resultant ORs. The association of the P376L variant with HDL-C, LDL-C and TG in the Global Lipids Genetics Consortium Exome Chip Genotyping study was assessed through meta-analysis of single variant score statistics in up to 301,025 individuals (71).

## Supplemental Text

### ***Conservation of SR-BI Proline 376 Across Species and Paralogues***

The proline at position 376 of SR-BI is highly conserved down through *Drosophila* and *Anopheles*, as well as in the closely related human genes CD36 and LIMP2 and is in a sequence of highly invariant residues (**Fig. S1**). The “consensus deleteriousness” score according to Condel was 0.906 (on a scale from 0 to 1, with 1 indicating maximum deleteriousness). Raptor X, a secondary structure prediction program, predicts that substitution of proline 376 with leucine increases the probability of this region to be in a beta-sheet confirmation from 36% to 61%. This finding is in agreement with the suggestion from the recently reported structure of another scavenger receptor LIMP-2 (72) that the region containing P376 in SR-BI is a disordered linker sequence joining beta strands 15 and 16 on the extracellular loop proximal to the C-terminal transmembrane domain.

### ***Impact of SCARB1 P376L on SR-BI processing and cholesterol ester uptake in transfected COS7 cells***

We tested the functional impact of the P376L variant on HDL-CE selective uptake in transfected COS7 cells. Studies with transfected COS7 cells revealed that the P376L variant was defective in promoting selective CE uptake (**Fig. S3A**) despite similar protein expression in total cell lysates (**Fig. S3B**). Notably, the P376L variant had less activity in this assay than one previously reported P297S variant (32) (**Fig. S3A**). In studies of <sup>125</sup>I-labeled HDL<sub>3</sub> binding at 4 °C, the P376L variant abrogated cell-surface binding (**Fig. S3C**), despite equal SR-BI protein levels in total cell lysates among groups (**Fig. S3D**).

We hypothesized that the reduced CE uptake and cell-surface HDL-binding by the SR-BI P376L variant could be due to abnormal processing of the mutant protein, preventing its cell-surface localization. To study this, we isolated cell-surface proteins from COS7 cells transfected with *SCARB1* WT, P376L and P297S using biotinylation and streptavidin pull-down. Western blotting of whole cell lysates compared with purified biotinylated samples (as tested by probing for β-actin and Na/K-ATPase) indicated that cell-surface expression of SR-BI P376L was markedly reduced compared to both WT and P297S (**Fig. S3E**). This suggested that the P376L mutation causes SR-BI to be retained inside the cell after translation. We next sought to determine the molecular defect underlying loss of cell-surface localization and CE uptake function by SR-BI P376L observed in the cell and mouse models. Given that SR-BI undergoes

N-glycosylation in the endoplasmic reticulum concomitant with proper folding and localization, we hypothesized that altered post-translational modification may underlie its reduced cell-surface localization (27-29). We measured the molecular weights of SR-BI forms after endoglycosidase-H (Endo-H) treatment of transfected COS7 expressing WT or mutant SR-BI (**Fig. S3F**). In COS7 cell lysates in the absence of Endo-H, whole cell lysates from cells transfected with SR-BI WT, P376L, or the P297S variant displayed a single band of approximately 65 kDa, representing fully glycosylated mature SR-BI. For all three constructs, Endo-H treatment resulted in a major band of approximately 45 kDa, representing the fully-deglycosylated (fully Endo-H sensitive) SR-BI protein. However, WT and P297S displayed additional larger bands consistent with a pool of partially Endo-H sensitive SR-BI possessing complex N-linked glycans, whereas P376L displayed only the single, unmodified, fully-sensitive band. Because of high levels of cDNA overexpression in the COS7 transfection, we believe the majority of the SR-BI across all groups in this experiment is not fully processed, thus resulting the relatively higher proportion of the total SR-BI exhibiting complete Endo-H sensitivity (**Fig. S3F**) relative to that observed in analogous experiments in iPSC-derived hepatocyte-like cell and murine hepatocyte lysates after Endo-H treatment (**Fig. 2F-G** of main text).

### ***Phenotyping studies of P376L homozygote and heterozygotes***

The P376L homozygote and eight P376L heterozygotes were recruited for additional deep phenotyping. Two age, sex, and race matched control groups were used, one with normal HDL-C levels (25<sup>th</sup>–75<sup>th</sup> percentile for age, race and sex) and a second with high HDL-C levels (>95<sup>th</sup> percentile for age, race and sex) in which *SCARB1* mutations were excluded. All of the P376L study participants were of European ancestry, almost exclusively of Ashkenazi Jewish descent. Two P376L heterozygotes, 4 normal HDL-C controls and 4 high HDL-C controls reported an alcohol intake of more than 1 drink per day, but there was no self-reported alcohol abuse. Smokers and subjects with diabetes were excluded. The P376L homozygote reported having a seizure disorder that was not treated pharmacologically at the time of participation.

Previous *in vitro*, mouse and human genetics studies have suggested that SR-BI in platelets is necessary for proper platelet activity and thrombosis (6, 32, 73-75). To test the effects of the P376L variant on platelet activity, we isolated platelets from carriers and controls and performed light transmission aggregometry (LTA) after stimulation with known platelet activators arachidonic acid, collagen, ADP and TRAP over a range of doses. We found only a

slight decrease in ADP-induced maximal aggregation in platelets isolated from the P376L homozygote relative to heterozygotes and control subjects at a dose of 5 mmol (**Fig. S5A**). No differences in platelet activity in response to other stimulants were observed between the groups. We also extracted lipids from platelets and measured platelet cholesterol content among groups. We observed that platelet cholesterol increased in a genotype dose-dependent manner from controls (mean 122 nmol/mg protein) to heterozygotes (mean 139 nmol/mg protein) to the homozygote subject (244 nmol/mg protein) (**Fig. S5B**). However, the difference between normal HDL-C controls and heterozygotes was not significant, and these differences were reduced when the values normalized to plasma total cholesterol levels, suggesting that elevated platelet cholesterol in carriers reflects increased plasma HDL-C levels rather than a platelet SR-BI specific function (**Fig. S5C**). There was also no difference in total circulating platelet levels among groups (data not shown).

SR-BI also takes up HDL-cholesteryl esters in adrenal glands and reproductive tissues for steroid hormone production in mice and humans (6, 18, 76), so we evaluated the impact of SCARB1 loss-of-function on steroid hormones in our recruited participants. We found no difference in morning serum cortisol, ACTH and 24-hr urinary cortisol-to-creatinine (**Fig. S6**) across participants, moderately higher testosterone in male P376L heterozygotes relative to normal HDL-C controls, but no differences across groups in FSH and LH.

**Fig. S1**

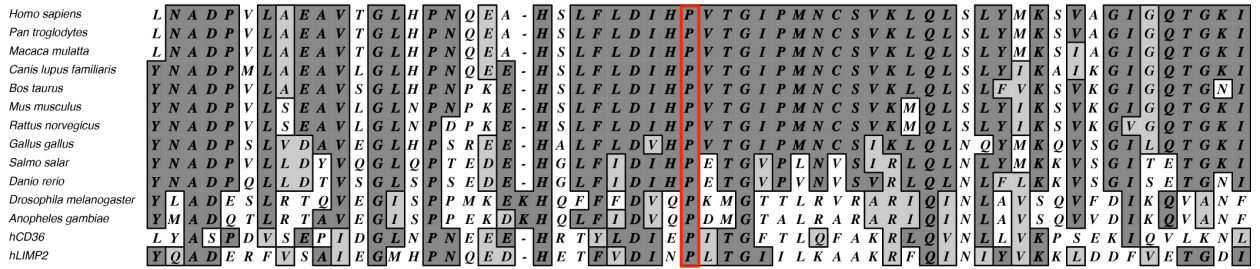

**Fig. S1. SR-BI Protein Sequence Alignment Across Species.** Amino acid sequence alignment of SR-BI across 12 species and human SR-BI paralogues CD36 and LIMP-2. Shown is the ~60 residue sequence alignment adjacent human SR-BI residue Pro376 (indicated by red box). Dark grey shading indicates full conservation of a given residue across indicated species. Light grey shading indicates a different but conservative amino acid for the given species compared to the others listed.

Fig. S2

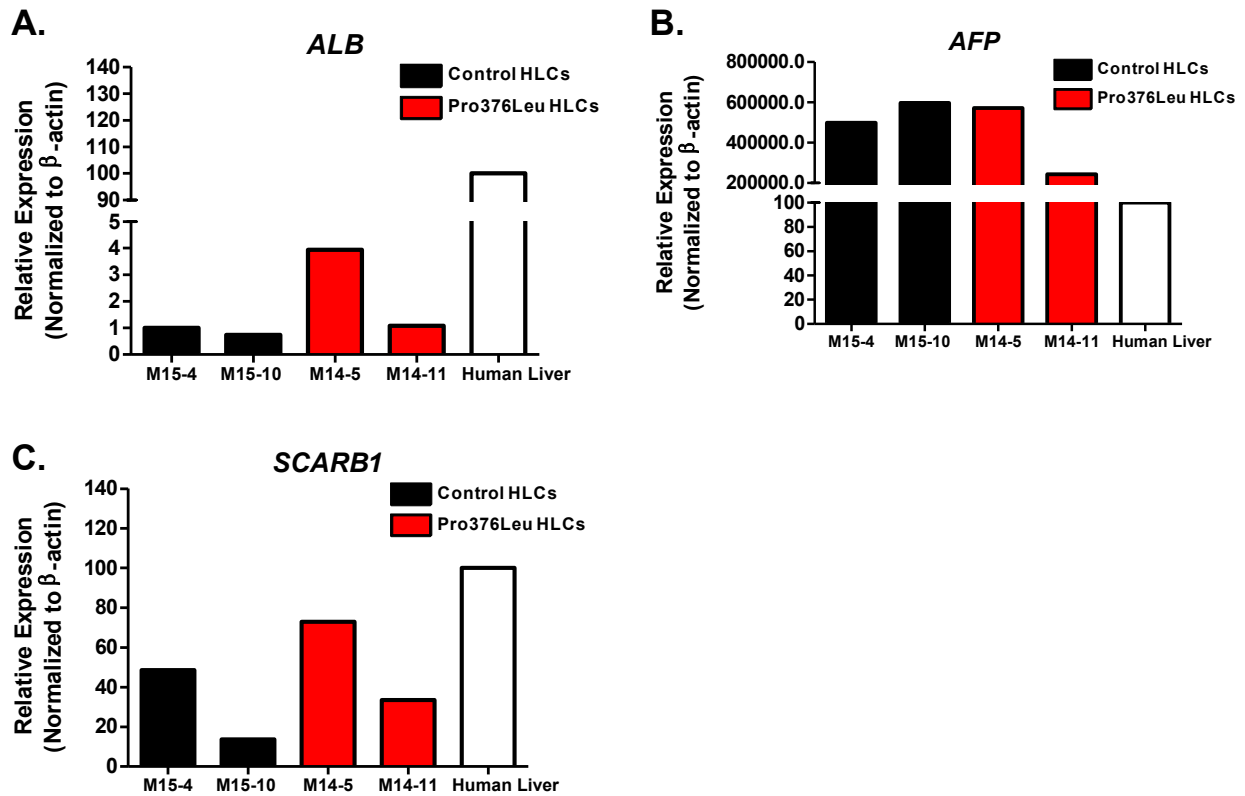

**Fig. S2. Gene expression in control and *SCARB1* P376L iPSC-derived hepatocyte-like cells (HLCs).** **A.** *ALB* Gene expression by quantitative RT-PCR of mRNA from control and P376L mutant iPSC-derived HLCs. Cells were differentiated 21–25 days before experiments and RNA isolation for gene expression analysis. **B.** *AFP* gene expression in iPSC-derived HLCs. **C.** *SCARB1* gene expression in iPSC-derived HLCs.



**Fig. S3**

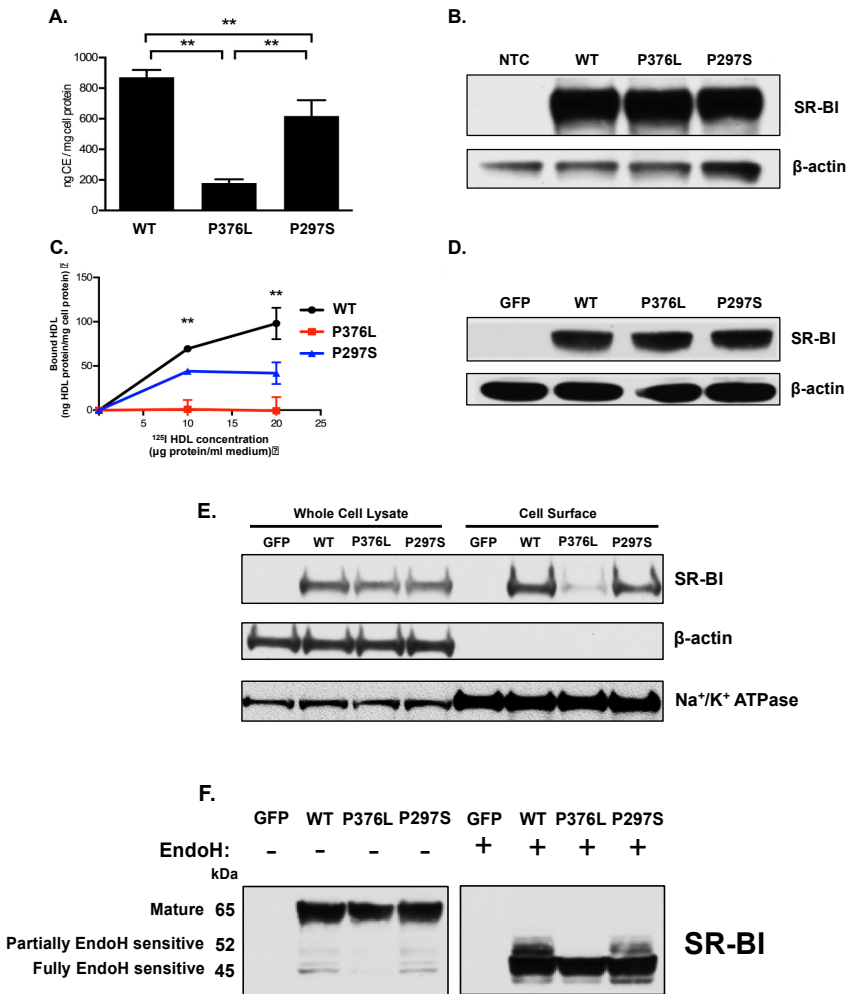

**Fig S3. *SCARB1* P376L abrogates SR-BI function in transfected COS7 cells.** **A.** Selective cholesterol uptake in COS7 cells expressing SR-BI WT vs. P376L. Cells were transfected with plasmids expressing WT, P376L or P297S forms of SR-BI and incubated at 37°C for 3 hours with <sup>125</sup>I/<sup>3</sup>H-labeled HDL<sub>3</sub> to determine HDL cholesterol ester (CE) specific uptake. Data represent the mean of a quintuplicate determination after subtraction of the determinations done with the addition of a 40-fold excess of cold HDL. **B.** Western blot showing SR-BI expression levels in whole cell lysates from COS7 cells transfected for selective cholesterol uptake experiment in (A). **C.** Binding of HDL to SR-BI at 4°C in transfected COS7 cells. Transfected cells were exposed to <sup>125</sup>I-labeled HDL<sub>3</sub> for 2 hours at 4°C to measure HDL binding. Radioactive counts from cells were then quantified to determine the amount of cell-associated <sup>125</sup>I-HDL<sub>3</sub>. Data points represent the mean +/- S.D. of a triplicate determination after subtraction of the

determinations done with the addition of a 40-fold excess of unlabeled HDL<sub>3</sub>. \*\* P<0.01, one-way ANOVA. **D.** Western blot showing SR-BI expression levels in whole cell lysates from COS7 cells transfected in panel (C). **E.** Immunoblot of SR-BI after cell-surface biotinylation in transfected COS7 cells. Cells were transfected with GFP, SR-BI WT, P376L or P297S plasmids and biotinylated before collection of whole cell lysate (left) or incubation with NuetrAvidin beads and elution of cell-surface localized proteins (right). Whole cell lysates (lanes 1–4) and cell-surface proteins (lanes 5–8) were separated by SDS-PAGE and immunoblotted for human SR-BI. Actin and Na/K-ATPase were used respectively as intracellular and surface-associated controls. **F.** Endo-H sensitivity of SR-BI from transfected COS7 cells. Cells were transfected with plasmids encoding GFP or different forms of SR-BI (WT, P376L, P297S) and cell lysates were treated with Endo-H to release complex N-linked glycans and molecular forms of SR-BI were monitored by immunoblotting. For A & C, data represent mean Error bars indicate mean values ± S.D. \*\* P<0.01, Student's unpaired T-test.

Fig. S4

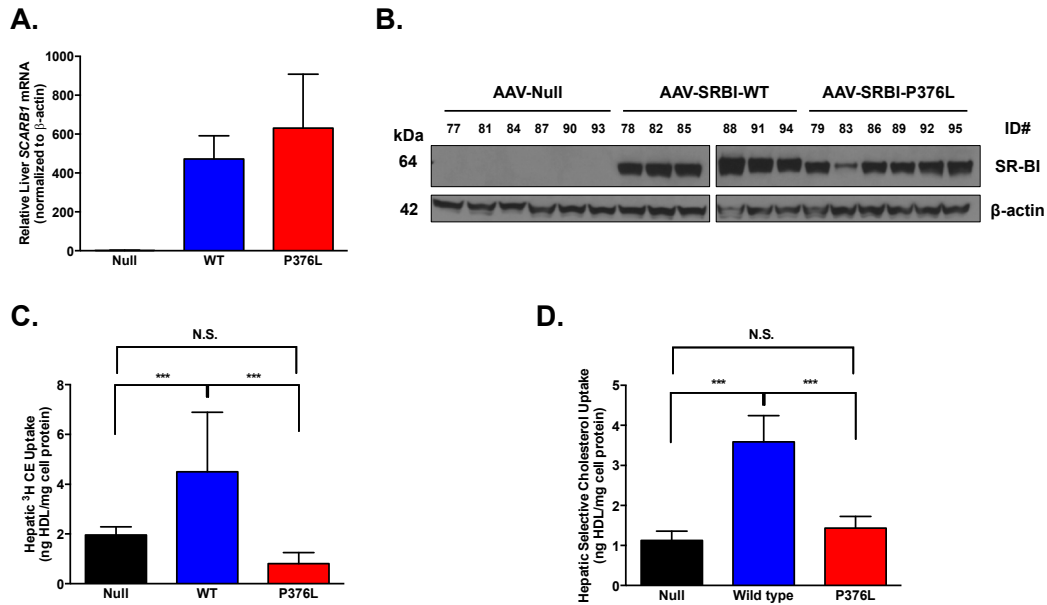

**Fig. S4. Hepatic *SCARB1* expression and impact on selective cholesterol uptake from HDL in mice.** **A.** Human *SCARB1* transcript expression levels measured by quantitative RT-PCR from livers of mice expressing Null or SR-BI AAV vectors. Gene expression was measured from total hepatic RNA after reverse transcription and normalized to expression levels of actin. **B.** SR-BI immunoblot (right) from livers of *Scarb1* KO mice expressing Null, SR-BI WT, and SR-BI P376L 2 weeks after AAV administration. **C.** Liver  $^3\text{H}$  CE uptake from dual-labeled HDL administration in mice expressing Null or SR-BI AAVs. **D.** Hepatic selective cholesterol uptake measured by relative difference of hepatic  $^3\text{H}$  CE and  $^{125}\text{I}$  TC uptake in livers of mice expressing Null or SR-BI AAVs after dual-labeled HDL administration. All data represent mean values  $\pm$  S.D. for each of the 3 groups. \* $P < 0.05$ , \*\*  $P < 0.01$ , \*\*\* $P < 0.001$ , Unpaired T-test.

**Fig. S5**

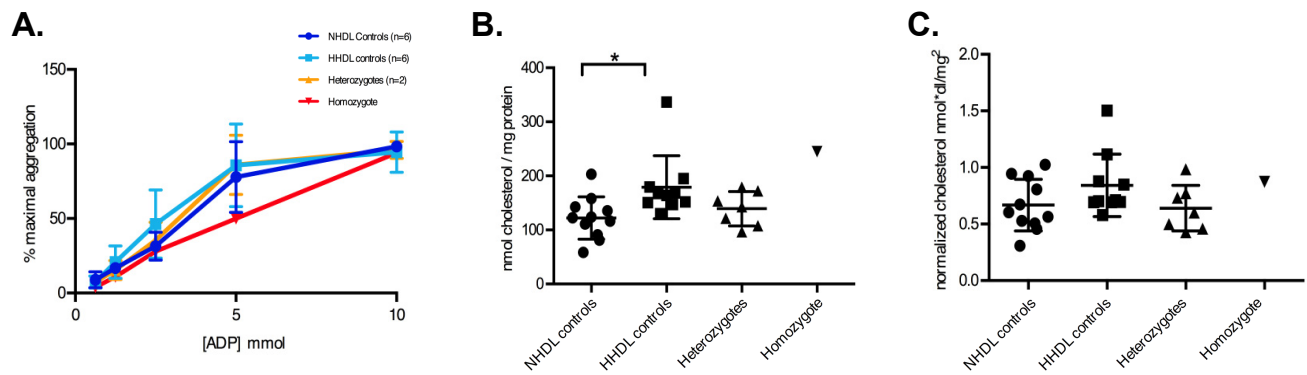

**Fig. S5. Platelet aggregation and cholesterol content.** **A.** Platelet aggregation measured by light transmission aggregometry after stimulation with increasing doses of ADP. Data represent the percentage maximal aggregation. **B.** Platelet cholesterol content measured by LC/MS. **C.** Platelet cholesterol content after normalization for plasma total cholesterol levels. Bars represent mean values  $\pm$  S.D.. \*  $P < 0.05$ , one-way ANOVA followed by Tukey's multiple comparisons test.

**Fig. S6**

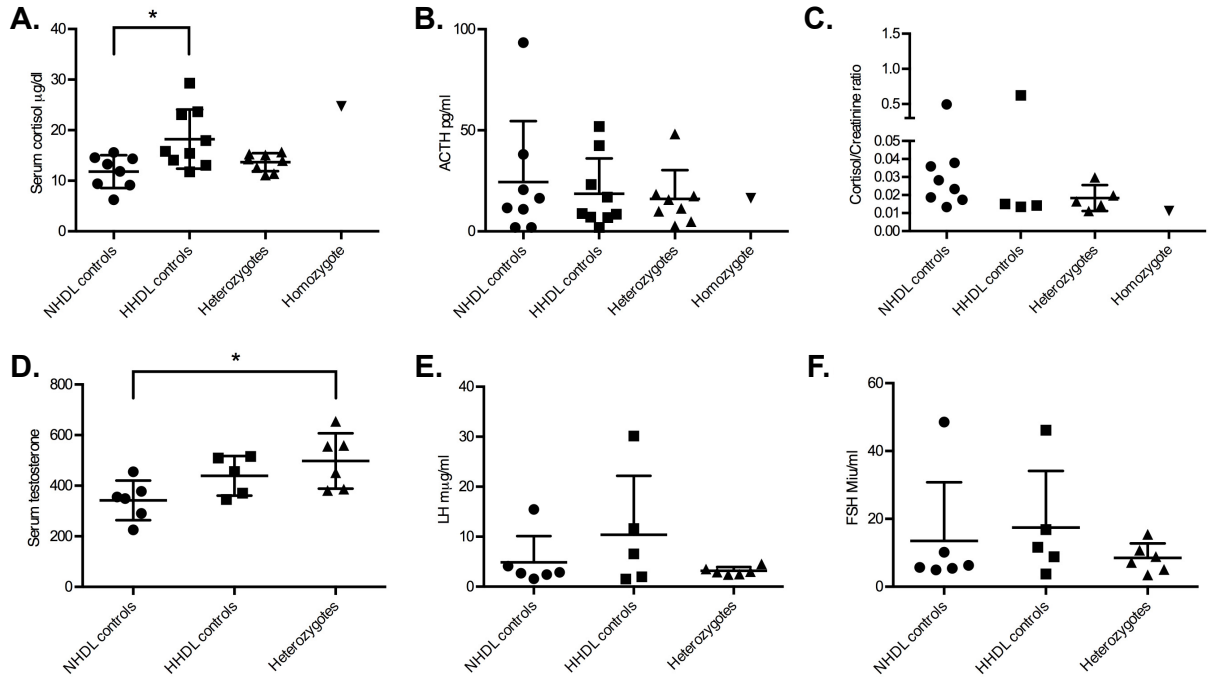

**Fig. S6. Impact of *SCARB1* P376L on adrenal and gonadal steroidogenesis.** **A.** Morning serum cortisol in carriers vs. controls. **B.** Morning plasma ACTH. **C.** Cortisol / creatinine ratio in 24-hour urine. **D.** Serum testosterone in males. **E.** Serum LH in males. **F.** Serum FSH in males. Bars represent mean values  $\pm$  S.D.. \*  $P < 0.05$ , one-way ANOVA followed by Tukey's multiple comparisons test.

**Fig. S7**

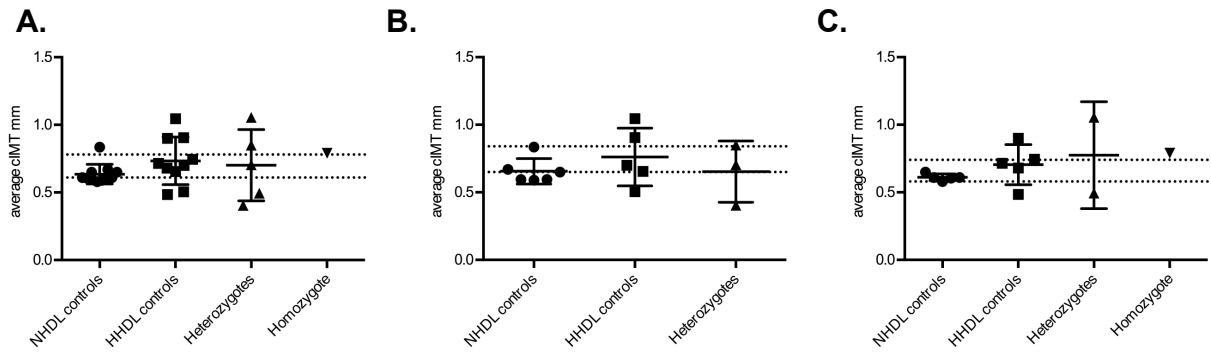

**Fig. S7. Carotid intima media thickness (cIMT) in *SCARB1* P376L carriers vs. controls. A.** cIMT for all subjects (male and female combined). **B & C.** cIMT results for males and females, respectively. Dotted lines represent the 25<sup>th</sup> and the 75<sup>th</sup> percentile values from the ARIC study. Bars represent mean values  $\pm$  S.D.. All data shows the average left / right cIMT.

**Table S1. Association of *SCARB1* P376L with plasma lipid traits in global lipids genetics consortium exome array genotyping.** The relationship between the frequency of P376L carriers and plasma lipid traits was measured in the Global Lipids Genetics Consortium cohort by genotyping of the variant on the Exome Array and using the Score test.

| <b>Trait</b> | <b>Number of subject included</b> | <b>Minor allele frequency</b> | <b>Beta (SE) in SD</b> | <b><i>P</i> value (score test)</b> |
|--------------|-----------------------------------|-------------------------------|------------------------|------------------------------------|
| <b>HDL-C</b> | 301025                            | 0.00033                       | +0.57 (0.071)          | $1.41 \times 10^{-15}$             |
| <b>LDL-C</b> | 280551                            | 0.00033                       | +0.065 (0.074)         | 0.381                              |
| <b>TG</b>    | 290277                            | 0.00034                       | -0.052 (0.072)         | 0.474                              |

## REFERENCES

1. D. J. Rader, A. R. Tall, The not-so-simple HDL story: Is it time to revise the HDL cholesterol hypothesis? *Nat. Med.* **18**, 1344–1346 (2012). [Medline doi:10.1038/nm.2937](#)
2. C. L. Haase, A. Tybjaerg-Hansen, A. A. Qayyum, J. Schou, B. G. Nordestgaard, R. Frikke-Schmidt, LCAT, HDL cholesterol and ischemic cardiovascular disease: A Mendelian randomization study of HDL cholesterol in 54,500 individuals. *J. Clin. Endocrinol. Metab.* **97**, E248–E256 (2012). [Medline doi:10.1210/jc.2011-1846](#)
3. R. Frikke-Schmidt, B. G. Nordestgaard, M. C. Stene, A. A. Sethi, A. T. Remaley, P. Schnohr, P. Grande, A. Tybjaerg-Hansen, Association of loss-of-function mutations in the *ABCA1* gene with high-density lipoprotein cholesterol levels and risk of ischemic heart disease. *JAMA* **299**, 2524–2532 (2008). [Medline doi:10.1001/jama.299.21.2524](#)
4. B. F. Voight, G. M. Peloso, M. Orho-Melander, R. Frikke-Schmidt, M. Barbalic, M. K. Jensen, G. Hindy, H. Hólm, E. L. Ding, T. Johnson, H. Schunkert, N. J. Samani, R. Clarke, J. C. Hopewell, J. F. Thompson, M. Li, G. Thorleifsson, C. Newton-Cheh, K. Musunuru, J. P. Pirruccello, D. Saleheen, L. Chen, A. Stewart, A. Schillert, U. Thorsteinsdottir, G. Thorgeirsson, S. Anand, J. C. Engert, T. Morgan, J. Spertus, M. Stoll, K. Berger, N. Martinelli, D. Girelli, P. P. McKeown, C. C. Patterson, S. E. Epstein, J. Devaney, M. S. Burnett, V. Mooser, S. Ripatti, I. Surakka, M. S. Nieminen, J. Sinisalo, M. L. Lokki, M. Perola, A. Havulinna, U. de Faire, B. Gigante, E. Ingelsson, T. Zeller, P. Wild, P. I. de Bakker, O. H. Klungel, A. H. Maitland-van der Zee, B. J. Peters, A. de Boer, D. E. Grobbee, P. W. Kamphuisen, V. H. Deneer, C. C. Elbers, N. C. Onland-Moret, M. H. Hofker, C. Wijmenga, W. M. Verschuren, J. M. Boer, Y. T. van der Schouw, A. Rasheed, P. Frossard, S. Demissie, C. Willer, R. Do, J. M. Ordovas, G. R. Abecasis, M. Boehnke, K. L. Mohlke, M. J. Daly, C. Guiducci, N. P. Burt, A. Surti, E. Gonzalez, S. Purcell, S. Gabriel, J. Marrugat, J. Peden, J. Erdmann, P. Diemert, C. Willenborg, I. R. König, M. Fischer, C. Hengstenberg, A. Ziegler, I. Buyschaert, D. Lambrechts, F. Van de Werf, K. A. Fox, N. E. El Mokhtari, D. Rubin, J. Schrezenmeir, S. Schreiber, A. Schäfer, J. Danesh, S. Blankenberg, R. Roberts, R. McPherson, H. Watkins, A. S. Hall, K. Overvad, E. Rimm, E. Boerwinkle, A. Tybjaerg-Hansen, L. A. Cupples, M. P. Reilly, O. Melander, P. M. Mannucci, D. Ardissino, D. Siscovick, R. Elosua, K. Stefansson, C. J. O'Donnell, V. Salomaa, D. J. Rader, L. Peltonen, S. M. Schwartz, D.



- Altshuler, S. Kathiresan, Plasma HDL cholesterol and risk of myocardial infarction: A mendelian randomisation study. *Lancet* **380**, 572–580 (2012). [Medline doi:10.1016/S0140-6736\(12\)60312-2](#)
5. S. Acton, A. Rigotti, K. T. Landschulz, S. Xu, H. H. Hobbs, M. Krieger, Identification of scavenger receptor SR-BI as a high density lipoprotein receptor. *Science* **271**, 518–520 (1996). [Medline doi:10.1126/science.271.5248.518](#)
  6. M. Hoekstra, T. J. Van Berkel, M. Van Eck, Scavenger receptor BI: A multi-purpose player in cholesterol and steroid metabolism. *World J. Gastroenterol.* **16**, 5916–5924 (2010). [Medline](#)
  7. N. Wang, T. Arai, Y. Ji, F. Rinninger, A. R. Tall, Liver-specific overexpression of scavenger receptor BI decreases levels of very low density lipoprotein ApoB, low density lipoprotein ApoB, and high density lipoprotein in transgenic mice. *J. Biol. Chem.* **273**, 32920–32926 (1998). [Medline doi:10.1074/jbc.273.49.32920](#)
  8. Y. Ueda, L. Royer, E. Gong, J. Zhang, P. N. Cooper, O. Francone, E. M. Rubin, Lower plasma levels and accelerated clearance of high density lipoprotein (HDL) and non-HDL cholesterol in scavenger receptor class B type I transgenic mice. *J. Biol. Chem.* **274**, 7165–7171 (1999). [Medline doi:10.1074/jbc.274.11.7165](#)
  9. K. F. Kozarsky, M. H. Donahee, A. Rigotti, S. N. Iqbal, E. R. Edelman, M. Krieger, Overexpression of the HDL receptor SR-BI alters plasma HDL and bile cholesterol levels. *Nature* **387**, 414–417 (1997). [Medline doi:10.1038/387414a0](#)
  10. Y. Ji, N. Wang, R. Ramakrishnan, E. Sehayek, D. Huszar, J. L. Breslow, A. R. Tall, Hepatic scavenger receptor BI promotes rapid clearance of high density lipoprotein free cholesterol and its transport into bile. *J. Biol. Chem.* **274**, 33398–33402 (1999). [Medline doi:10.1074/jbc.274.47.33398](#)
  11. M. L. Varban, F. Rinninger, N. Wang, V. Fairchild-Huntress, J. H. Dunmore, Q. Fang, M. L. Gosselin, K. L. Dixon, J. D. Deeds, S. L. Acton, A. R. Tall, D. Huszar, Targeted mutation reveals a central role for SR-BI in hepatic selective uptake of high density lipoprotein cholesterol. *Proc. Natl. Acad. Sci. U.S.A.* **95**, 4619–4624 (1998). [Medline doi:10.1073/pnas.95.8.4619](#)
  12. A. Rigotti, B. L. Trigatti, M. Penman, H. Rayburn, J. Herz, M. Krieger, A targeted mutation in the murine gene encoding the high density lipoprotein (HDL) receptor scavenger

- receptor class B type I reveals its key role in HDL metabolism. *Proc. Natl. Acad. Sci. U.S.A.* **94**, 12610–12615 (1997). [Medline doi:10.1073/pnas.94.23.12610](#)
13. M. Brundert, A. Ewert, J. Heeren, B. Behrendt, R. Ramakrishnan, H. Greten, M. Merkel, F. Rinninger, Scavenger receptor class B type I mediates the selective uptake of high-density lipoprotein-associated cholesteryl ester by the liver in mice. *Arterioscler. Thromb. Vasc. Biol.* **25**, 143–148 (2005). [Medline](#)
  14. Y. Ueda, E. Gong, L. Royer, P. N. Cooper, O. L. Francone, E. M. Rubin, Relationship between expression levels and atherogenesis in scavenger receptor class B, type I transgenics. *J. Biol. Chem.* **275**, 20368–20373 (2000). [Medline doi:10.1074/jbc.M000730200](#)
  15. K. F. Kozarsky, M. H. Donahee, J. M. Glick, M. Krieger, D. J. Rader, Gene transfer and hepatic overexpression of the HDL receptor SR-BI reduces atherosclerosis in the cholesterol-fed LDL receptor-deficient mouse. *Arterioscler. Thromb. Vasc. Biol.* **20**, 721–727 (2000). [Medline doi:10.1161/01.ATV.20.3.721](#)
  16. T. Arai, N. Wang, M. Bezouevski, C. Welch, A. R. Tall, Decreased atherosclerosis in heterozygous low density lipoprotein receptor-deficient mice expressing the scavenger receptor BI transgene. *J. Biol. Chem.* **274**, 2366–2371 (1999). [Medline doi:10.1074/jbc.274.4.2366](#)
  17. M. Van Eck, J. Twisk, M. Hoekstra, B. T. Van Rij, C. A. Van der Lans, I. S. Bos, J. K. Kruijt, F. Kuipers, T. J. Van Berkel, Differential effects of scavenger receptor BI deficiency on lipid metabolism in cells of the arterial wall and in the liver. *J. Biol. Chem.* **278**, 23699–23705 (2003). [Medline doi:10.1074/jbc.M211233200](#)
  18. B. Trigatti, H. Rayburn, M. Viñals, A. Braun, H. Miettinen, M. Penman, M. Hertz, M. Schrenzel, L. Amigo, A. Rigotti, M. Krieger, Influence of the high density lipoprotein receptor SR-BI on reproductive and cardiovascular pathophysiology. *Proc. Natl. Acad. Sci. U.S.A.* **96**, 9322–9327 (1999). [Medline doi:10.1073/pnas.96.16.9322](#)
  19. D. Huszar, M. L. Varban, F. Rinninger, R. Feeley, T. Arai, V. Fairchild-Huntress, M. J. Donovan, A. R. Tall, Increased LDL cholesterol and atherosclerosis in LDL receptor-deficient mice with attenuated expression of scavenger receptor B1. *Arterioscler. Thromb. Vasc. Biol.* **20**, 1068–1073 (2000). [Medline doi:10.1161/01.ATV.20.4.1068](#)

20. A. Braun, B. L. Trigatti, M. J. Post, K. Sato, M. Simons, J. M. Edelberg, R. D. Rosenberg, M. Schrenzel, M. Krieger, Loss of SR-BI expression leads to the early onset of occlusive atherosclerotic coronary artery disease, spontaneous myocardial infarctions, severe cardiac dysfunction, and premature death in apolipoprotein E-deficient mice. *Circ. Res.* **90**, 270–276 (2002). [Medline doi:10.1161/hh0302.104462](#)
21. Y. Zhang, J. R. Da Silva, M. Reilly, J. T. Billheimer, G. H. Rothblat, D. J. Rader, Hepatic expression of scavenger receptor class B type I (SR-BI) is a positive regulator of macrophage reverse cholesterol transport in vivo. *J. Clin. Invest.* **115**, 2870–2874 (2005). [Medline doi:10.1172/JCI25327](#)
22. T. M. Teslovich, K. Musunuru, A. V. Smith, A. C. Edmondson, I. M. Stylianou, M. Koseki, J. P. Pirruccello, S. Ripatti, D. I. Chasman, C. J. Willer, C. T. Johansen, S. W. Fouchier, A. Isaacs, G. M. Peloso, M. Barbalic, S. L. Ricketts, J. C. Bis, Y. S. Aulchenko, G. Thorleifsson, M. F. Feitosa, J. Chambers, M. Orho-Melander, O. Melander, T. Johnson, X. Li, X. Guo, M. Li, Y. Shin Cho, M. Jin Go, Y. Jin Kim, J.-Y. Lee, T. Park, K. Kim, X. Sim, R. Twee-Hee Ong, D. C. Croteau-Chonka, L. A. Lange, J. D. Smith, K. Song, J. Hua Zhao, X. Yuan, J. Luan, C. Lamina, A. Ziegler, W. Zhang, R. Y. Zee, A. F. Wright, J. C. Witteman, J. F. Wilson, G. Willemsen, H.-E. Wichmann, J. B. Whitfield, D. M. Waterworth, N. J. Wareham, G. Waeber, P. Vollenweider, B. F. Voight, V. Vitart, A. G. Uitterlinden, M. Uda, J. Tuomilehto, J. R. Thompson, T. Tanaka, I. Surakka, H. M. Stringham, T. D. Spector, N. Soranzo, J. H. Smit, J. Sinisalo, K. Silander, E. J. G. Sijbrands, A. Scuteri, J. Scott, D. Schlessinger, S. Sanna, V. Salomaa, J. Saharinen, C. Sabatti, A. Ruukonen, I. Rudan, L. M. Rose, R. Roberts, M. Rieder, B. M. Psaty, P. P. Pramstaller, I. Pichler, M. Perola, B. W. J. H. Penninx, N. L. Pedersen, C. Pattaro, A. N. Parker, G. Pare, B. A. Oostra, C. J. O'Donnell, M. S. Nieminen, D. A. Nickerson, G. W. Montgomery, T. Meitinger, R. McPherson, M. I. McCarthy, W. McArdle, D. Masson, N. G. Martin, F. Marroni, M. Mangino, P. K. E. Magnusson, G. Lucas, R. Luben, R. J. F. Loos, M.-L. Lokki, G. Lettre, C. Langenberg, L. J. Launer, E. G. Lakatta, R. Laaksonen, K. O. Kyvik, F. Kronenberg, I. R. König, K.-T. Khaw, J. Kaprio, L. M. Kaplan, Å. Johansson, M.-R. Jarvelin, A. C. Janssens, E. Ingelsson, W. Igl, G. Kees Hovingh, J.-J. Hottenga, A. Hofman, A. A. Hicks, C. Hengstenberg, I. M. Heid, C. Hayward, A. S. Havulinna, N. D. Hastie, T. B. Harris, T. Haritunians, A. S. Hall, U. Gyllenstein, C.

- Guiducci, L. C. Groop, E. Gonzalez, C. Gieger, N. B. Freimer, L. Ferrucci, J. Erdmann, P. Elliott, K. G. Ejebe, A. Döring, A. F. Dominiczak, S. Demissie, P. Deloukas, E. J. C. de Geus, U. de Faire, G. Crawford, F. S. Collins, Y.-D. Chen, M. J. Caulfield, H. Campbell, N. P. Burt, L. L. Bonnycastle, D. I. Boomsma, S. M. Boekholdt, R. N. Bergman, I. Barroso, S. Bandinelli, C. M. Ballantyne, T. L. Assimes, T. Quertermous, D. Altshuler, M. Seielstad, T. Y. Wong, E. S. Tai, A. B. Feranil, C. W. Kuzawa, L. S. Adair, H. A. Taylor Jr., I. B. Borecki, S. B. Gabriel, J. G. Wilson, H. Holm, U. Thorsteinsdottir, V. Gudnason, R. M. Krauss, K. L. Mohlke, J. M. Ordovas, P. B. Munroe, J. S. Kooner, A. R. Tall, R. A. Hegele, J. J. P. Kastelein, E. E. Schadt, J. I. Rotter, E. Boerwinkle, D. P. Strachan, V. Mooser, K. Stefansson, M. P. Reilly, N. J. Samani, H. Schunkert, L. A. Cupples, M. S. Sandhu, P. M. Ridker, D. J. Rader, C. M. van Duijn, L. Peltonen, G. R. Abecasis, M. Boehnke, S. Kathiresan, Biological, clinical and population relevance of 95 loci for blood lipids. *Nature* **466**, 707–713 (2010). [Medline doi:10.1038/nature09270](#)
23. A. Ghodsizadeh, A. Taei, M. Totonchi, A. Seifinejad, H. Gourabi, B. Pournasr, N. Aghdami, R. Malekzadeh, N. Almadani, G. H. Salekdeh, H. Baharvand, Generation of liver disease-specific induced pluripotent stem cells along with efficient differentiation to functional hepatocyte-like cells. *Stem Cell Rev.* **6**, 622–632 (2010). [Medline doi:10.1007/s12015-010-9189-3](#)
24. M. A. Cayo, J. Cai, A. DeLaForest, F. K. Noto, M. Nagaoka, B. S. Clark, R. F. Collery, K. Si-Tayeb, S. A. Duncan, JD induced pluripotent stem cell-derived hepatocytes faithfully recapitulate the pathophysiology of familial hypercholesterolemia. *Hepatology* **56**, 2163–2171 (2012). [Medline doi:10.1002/hep.25871](#)
25. S. K. Mallanna, S. A. Duncan, Differentiation of hepatocytes from pluripotent stem cells. *Curr. Protocol Stem Cell Biol.* **26** (Unit 1G), 4 (2013).
26. K. Si-Tayeb, F. K. Noto, M. Nagaoka, J. Li, M. A. Battle, C. Duris, P. E. North, S. Dalton, S. A. Duncan, Highly efficient generation of human hepatocyte-like cells from induced pluripotent stem cells. *Hepatology* **51**, 297–305 (2010). [Medline doi:10.1002/hep.23354](#)
27. J. Babitt, B. Trigatti, A. Rigotti, E. J. Smart, R. G. Anderson, S. Xu, M. Krieger, Murine SR-BI, a high density lipoprotein receptor that mediates selective lipid uptake, is N-glycosylated and fatty acylated and colocalizes with plasma membrane caveolae. *J. Biol. Chem.* **272**, 13242–13249 (1997). [Medline doi:10.1074/jbc.272.20.13242](#)

28. M. Viñals, S. Xu, E. Vasile, M. Krieger, Identification of the N-linked glycosylation sites on the high density lipoprotein (HDL) receptor SR-BI and assessment of their effects on HDL binding and selective lipid uptake. *J. Biol. Chem.* **278**, 5325–5332 (2003). [Medline doi:10.1074/jbc.M211073200](#)
29. D. Calvo, D. Gómez-Coronado, M. A. Lasunción, M. A. Vega, CLA-1 is an 85-kD plasma membrane glycoprotein that acts as a high-affinity receptor for both native (HDL, LDL, and VLDL) and modified (OxLDL and AcLDL) lipoproteins. *Arterioscler. Thromb. Vasc. Biol.* **17**, 2341–2349 (1997). [Medline doi:10.1161/01.ATV.17.11.2341](#)
30. C. C. Schwartz, J. M. VandenBroek, P. S. Cooper, Lipoprotein cholesteryl ester production, transfer, and output in vivo in humans. *J. Lipid Res.* **45**, 1594–1607 (2004). [Medline doi:10.1194/jlr.M300511-JLR200](#)
31. M. Vergeer, S. J. Korporaal, R. Franssen, I. Meurs, R. Out, G. K. Hovingh, M. Hoekstra, J. A. Sierts, G. M. Dallinga-Thie, M. M. Motazacker, A. G. Holleboom, T. J. Van Berkel, J. J. Kastelein, M. Van Eck, J. A. Kuivenhoven, Genetic variant of the scavenger receptor BI in humans. *N. Engl. J. Med.* **364**, 136–145 (2011). [Medline doi:10.1056/NEJMoa0907687](#)
32. R. B. Hildebrand, B. Lammers, I. Meurs, S. J. Korporaal, W. De Haan, Y. Zhao, J. K. Kruijt, D. Praticò, A. W. Schimmel, A. G. Holleboom, M. Hoekstra, J. A. Kuivenhoven, T. J. Van Berkel, P. C. Rensen, M. Van Eck, Restoration of high-density lipoprotein levels by cholesteryl ester transfer protein expression in scavenger receptor class B type I (SR-BI) knockout mice does not normalize pathologies associated with SR-BI deficiency. *Arterioscler. Thromb. Vasc. Biol.* **30**, 1439–1445 (2010). [Medline doi:10.1161/ATVBAHA.110.205153](#)
33. L. Lagrost, H. Gandjini, A. Athias, V. Guyard-Dangremont, C. Lallemand, P. Gambert, Influence of plasma cholesteryl ester transfer activity on the LDL and HDL distribution profiles in normolipidemic subjects. *Arterioscler. Thromb.* **13**, 815–825 (1993). [Medline doi:10.1161/01.ATV.13.6.815](#)
34. H. E. Miettinen, H. Rayburn, M. Krieger, Abnormal lipoprotein metabolism and reversible female infertility in HDL receptor (SR-BI)-deficient mice. *J. Clin. Invest.* **108**, 1717–1722 (2001). [Medline doi:10.1172/JCI13288](#)

35. M. Hoekstra, I. Meurs, M. Koenders, R. Out, R. B. Hildebrand, J. K. Kruijt, M. Van Eck, T. J. Van Berkel, Absence of HDL cholesteryl ester uptake in mice via SR-BI impairs an adequate adrenal glucocorticoid-mediated stress response to fasting. *J. Lipid Res.* **49**, 738–745 (2008). [Medline doi:10.1194/jlr.M700475-JLR200](#)
36. M. Hoekstra, D. Ye, R. B. Hildebrand, Y. Zhao, B. Lammers, M. Stitzinger, J. Kuiper, T. J. Van Berkel, M. Van Eck, Scavenger receptor class B type I-mediated uptake of serum cholesterol is essential for optimal adrenal glucocorticoid production. *J. Lipid Res.* **50**, 1039–1046 (2009). [Medline doi:10.1194/jlr.M800410-JLR200](#)
37. O. Kocher, A. Yesilaltay, C. Cirovic, R. Pal, A. Rigotti, M. Krieger, Targeted disruption of the PDZK1 gene in mice causes tissue-specific depletion of the high density lipoprotein receptor scavenger receptor class B type I and altered lipoprotein metabolism. *J. Biol. Chem.* **278**, 52820–52825 (2003). [Medline doi:10.1074/jbc.M310482200](#)
38. C. Mineo, P. W. Shaul, Functions of scavenger receptor class B, type I in atherosclerosis. *Curr. Opin. Lipidol.* **23**, 487–493 (2012). [Medline doi:10.1097/MOL.0b013e328357ba61](#)
39. A. Rigotti, H. E. Miettinen, M. Krieger, The role of the high-density lipoprotein receptor SR-BI in the lipid metabolism of endocrine and other tissues. *Endocr. Rev.* **24**, 357–387 (2003). [Medline doi:10.1210/er.2001-0037](#)
40. A. Gnirke, A. Melnikov, J. Maguire, P. Rogov, E. M. LeProust, W. Brockman, T. Fennell, G. Giannoukos, S. Fisher, C. Russ, S. Gabriel, D. B. Jaffe, E. S. Lander, C. Nusbaum, Solution hybrid selection with ultra-long oligonucleotides for massively parallel targeted sequencing. *Nat. Biotechnol.* **27**, 182–189 (2009). [Medline doi:10.1038/nbt.1523](#)
41. P. Cingolani, A. Platts, L. Wang, M. Coon, T. Nguyen, L. Wang, S. J. Land, X. Lu, D. M. Ruden, A program for annotating and predicting the effects of single nucleotide polymorphisms, SnpEff: SNPs in the genome of *Drosophila melanogaster* strain w1118; iso-2; iso-3. *Fly (Austin)* **6**, 80–92 (2012). [Medline doi:10.4161/fly.19695](#)
42. F. Sanger, S. Nicklen, A. R. Coulson, DNA sequencing with chain-terminating inhibitors. *Proc. Natl. Acad. Sci. U.S.A.* **74**, 5463–5467 (1977). [Medline doi:10.1073/pnas.74.12.5463](#)
43. A. González-Pérez, N. López-Bigas, Improving the assessment of the outcome of nonsynonymous SNVs with a consensus deleteriousness score, Condel. *Am. J. Hum. Genet.* **88**, 440–449 (2011). [Medline doi:10.1016/j.ajhg.2011.03.004](#)

44. I. A. Adzhubei, S. Schmidt, L. Peshkin, V. E. Ramensky, A. Gerasimova, P. Bork, A. S. Kondrashov, S. R. Sunyaev, A method and server for predicting damaging missense mutations. *Nat. Methods* **7**, 248–249 (2010). [Medline doi:10.1038/nmeth0410-248](#)
45. M. Källberg, H. Wang, S. Wang, J. Peng, Z. Wang, H. Lu, J. Xu, Template-based protein structure modeling using the RaptorX web server. *Nat. Protoc.* **7**, 1511–1522 (2012). [Medline doi:10.1038/nprot.2012.085](#)
46. Z. Wang, F. Zhao, J. Peng, J. Xu, Protein 8-class secondary structure prediction using conditional neural fields. *Proteomics* **11**, 3786–3792 (2011). [Medline doi:10.1002/pmic.201100196](#)
47. S. Somanathan, F. Jacobs, Q. Wang, A. L. Hanlon, J. M. Wilson, D. J. Rader, AAV vectors expressing LDLR gain-of-function variants demonstrate increased efficacy in mouse models of familial hypercholesterolemia. *Circ. Res.* **115**, 591–599 (2014). [Medline doi:10.1161/CIRCRESAHA.115.304008](#)
48. S. J. Chen, J. Sanmiguel, M. Lock, D. McMenamin, C. Draper, M. P. Limberis, S. H. Kassim, S. Somanathan, P. Bell, J. C. Johnston, D. J. Rader, J. M. Wilson, Biodistribution of AAV8 vectors expressing human low-density lipoprotein receptor in a mouse model of homozygous familial hypercholesterolemia. *Hum. Gene Ther. Clin. Dev.* **24**, 154–160 (2013). [Medline doi:10.1089/humc.2013.082](#)
49. S. H. Kassim, H. Li, P. Bell, S. Somanathan, W. Lagor, F. Jacobs, J. Billheimer, J. M. Wilson, D. J. Rader, Adeno-associated virus serotype 8 gene therapy leads to significant lowering of plasma cholesterol levels in humanized mouse models of homozygous and heterozygous familial hypercholesterolemia. *Hum. Gene Ther.* **24**, 19–26 (2013). [Medline doi:10.1089/hum.2012.108](#)
50. S. H. Kassim, H. Li, L. H. Vandenberghe, C. Hinderer, P. Bell, D. Marchadier, A. Wilson, D. Cromley, V. Redon, H. Yu, J. M. Wilson, D. J. Rader, Gene therapy in a humanized mouse model of familial hypercholesterolemia leads to marked regression of atherosclerosis. *PLOS ONE* **5**, e13424 (2010). [Medline doi:10.1371/journal.pone.0013424](#)
51. K. Kitajima, D. H. Marchadier, G. C. Miller, G. P. Gao, J. M. Wilson, D. J. Rader, Complete prevention of atherosclerosis in apoE-deficient mice by hepatic human apoE gene

- transfer with adeno-associated virus serotypes 7 and 8. *Arterioscler. Thromb. Vasc. Biol.* **26**, 1852–1857 (2006). [Medline doi:10.1161/01.ATV.0000231520.26490.54](#)
52. S. J. Chen, D. J. Rader, J. Tazelaar, M. Kawashiri, G. Gao, J. M. Wilson, Prolonged correction of hyperlipidemia in mice with familial hypercholesterolemia using an adeno-associated viral vector expressing very-low-density lipoprotein receptor. *Mol. Ther.* **2**, 256–261 (2000). [Medline doi:10.1006/mthe.2000.0122](#)
53. F. T. Hatch, R. S. Lees, Practical methods for plasma lipoprotein analysis. *Adv. Lipid Res.* **6**, 1–68 (1968). [Medline doi:10.1016/B978-1-4831-9942-9.50008-5](#)
54. U. J. Tietge, C. Maugeais, W. Cain, D. Grass, J. M. Glick, F. C. de Beer, D. J. Rader, Overexpression of secretory phospholipase A(2) causes rapid catabolism and altered tissue uptake of high density lipoprotein cholesteryl ester and apolipoprotein A-I. *J. Biol. Chem.* **275**, 10077–10084 (2000). [Medline doi:10.1074/jbc.275.14.10077](#)
55. O. H. Lowry, N. J. Rosebrough, A. L. Farr, R. J. Randall, Protein measurement with the Folin phenol reagent. *J. Biol. Chem.* **193**, 265–275 (1951). [Medline](#)
56. S. Azhar, L. Tsai, E. Reaven, Uptake and utilization of lipoprotein cholesteryl esters by rat granulosa cells. *Biochim. Biophys. Acta* **1047**, 148–160 (1990). [Medline doi:10.1016/0005-2760\(90\)90041-U](#)
57. M. A. Connelly, S. M. Klein, S. Azhar, N. A. Abumrad, D. L. Williams, Comparison of class B scavenger receptors, CD36 and scavenger receptor BI (SR-BI), shows that both receptors mediate high density lipoprotein-cholesteryl ester selective uptake but SR-BI exhibits a unique enhancement of cholesteryl ester uptake. *J. Biol. Chem.* **274**, 41–47 (1999). [Medline doi:10.1074/jbc.274.1.41](#)
58. T. J. Nieland, S. Xu, M. Penman, M. Krieger, Negatively cooperative binding of high-density lipoprotein to the HDL receptor SR-BI. *Biochemistry* **50**, 1818–1830 (2011). [Medline doi:10.1021/bi101657j](#)
59. J. Cai *et al.*, in *StemBook* (Cambridge, MA, 2008).
60. W. Yang *et al.*, in *StemBook* (Cambridge, MA, 2008).
61. U. J. Tietge, C. Maugeais, W. Cain, D. J. Rader, Acute inflammation increases selective uptake of HDL cholesteryl esters into adrenals of mice overexpressing human sPLA2. *Am. J. Physiol. Endocrinol. Metab.* **285**, E403–E411 (2003). [Medline doi:10.1152/ajpendo.00576.2002](#)



62. C. A. Schneider, W. S. Rasband, K. W. Eliceiri, NIH Image to ImageJ: 25 years of image analysis. *Nat. Methods* **9**, 671–675 (2012). [Medline doi:10.1038/nmeth.2089](#)
63. M. Cuchel, L. T. Bloedon, P. O. Szapary, D. M. Kolansky, M. L. Wolfe, A. Sarkis, J. S. Millar, K. Ikewaki, E. S. Siegelman, R. E. Gregg, D. J. Rader, Inhibition of microsomal triglyceride transfer protein in familial hypercholesterolemia. *N. Engl. J. Med.* **356**, 148–156 (2007). [Medline doi:10.1056/NEJMoa061189](#)
64. L. U. Gerdes, C. Gerdes, I. C. Klausen, O. Faergeman, Generation of analytic plasma lipoprotein profiles using two prepacked Superose 6B columns. *Clin. Chim. Acta* **205**, 1–9 (1992). [Medline doi:10.1016/0009-8981\(92\)90348-T](#)
65. V. Nambi, L. Chambless, A. R. Folsom, M. He, Y. Hu, T. Mosley, K. Volcik, E. Boerwinkle, C. M. Ballantyne, Carotid intima-media thickness and presence or absence of plaque improves prediction of coronary heart disease risk: The ARIC (Atherosclerosis Risk In Communities) study. *J. Am. Coll. Cardiol.* **55**, 1600–1607 (2010). [Medline doi:10.1016/j.jacc.2009.11.075](#)
66. J. H. Stein, C. E. Korcarz, R. T. Hurst, E. Lonn, C. B. Kendall, E. R. Mohler, S. S. Najjar, C. M. Rembold, W. S. Post; American Society of Echocardiography Carotid Intima-Media Thickness Task Force, Use of carotid ultrasound to identify subclinical vascular disease and evaluate cardiovascular disease risk: A consensus statement from the American Society of Echocardiography Carotid Intima-Media Thickness Task Force, Endorsed by the Society for Vascular Medicine,. *J. Am. Soc. Echocardiogr.* **21**, 93–111, quiz 189–190 (2008). [Medline doi:10.1016/j.echo.2007.11.011](#)
67. P. A. Harris, R. Taylor, R. Thielke, J. Payne, N. Gonzalez, J. G. Conde, Research electronic data capture (REDCap)—a metadata-driven methodology and workflow process for providing translational research informatics support. *J. Biomed. Inform.* **42**, 377–381 (2009). [Medline doi:10.1016/j.jbi.2008.08.010](#)
68. M. J. Chapman, S. Goldstein, D. Lagrange, P. M. Laplaud, A density gradient ultracentrifugal procedure for the isolation of the major lipoprotein classes from human serum. *J. Lipid Res.* **22**, 339–358 (1981). [Medline](#)
69. M. Guerin, T. S. Lassel, W. Le Goff, M. Farnier, M. J. Chapman, Action of atorvastatin in combined hyperlipidemia : Preferential reduction of cholesteryl ester transfer from HDL

- to VLDL1 particles. *Arterioscler. Thromb. Vasc. Biol.* **20**, 189–197 (2000). [Medline doi:10.1161/01.ATV.20.1.189](#)
70. L. Camont, M. Lhomme, F. Rached, W. Le Goff, A. Nègre-Salvayre, R. Salvayre, C. Calzada, M. Lagarde, M. J. Chapman, A. Kontush, Small, dense high-density lipoprotein-3 particles are enriched in negatively charged phospholipids: Relevance to cellular cholesterol efflux, antioxidative, antithrombotic, anti-inflammatory, and antiapoptotic functionalities. *Arterioscler. Thromb. Vasc. Biol.* **33**, 2715–2723 (2013). [Medline doi:10.1161/ATVBAHA.113.301468](#)
71. D. J. Liu, G. M. Peloso, X. Zhan, O. L. Holmen, M. Zawistowski, S. Feng, M. Nikpay, P. L. Auer, A. Goel, H. Zhang, U. Peters, M. Farrall, M. Orho-Melander, C. Kooperberg, R. McPherson, H. Watkins, C. J. Willer, K. Hveem, O. Melander, S. Kathiresan, G. R. Abecasis, Meta-analysis of gene-level tests for rare variant association. *Nat. Genet.* **46**, 200–204 (2014). [Medline doi:10.1038/ng.2852](#)
72. D. Neculai, M. Schwake, M. Ravichandran, F. Zunke, R. F. Collins, J. Peters, M. Neculai, J. Plumb, P. Loppnau, J. C. Pizarro, A. Seitova, W. S. Trimble, P. Saftig, S. Grinstein, S. Dhe-Paganon, Structure of LIMP-2 provides functional insights with implications for SR-BI and CD36. *Nature* **504**, 172–176 (2013). [Medline doi:10.1038/nature12684](#)
73. J. R. Nofer, M. van Eck, HDL scavenger receptor class B type I and platelet function. *Curr. Opin. Lipidol.* **22**, 277–282 (2011). [Medline doi:10.1097/MOL.0b013e32834701de](#)
74. V. S. Dole, J. Matuskova, E. Vasile, A. Yesilaltay, W. Bergmeier, M. Bernimoulin, D. D. Wagner, M. Krieger, Thrombocytopenia and platelet abnormalities in high-density lipoprotein receptor-deficient mice. *Arterioscler. Thromb. Vasc. Biol.* **28**, 1111–1116 (2008). [Medline doi:10.1161/ATVBAHA.108.162347](#)
75. Y. Ma, M. Z. Ashraf, E. A. Podrez, Scavenger receptor BI modulates platelet reactivity and thrombosis in dyslipidemia. *Blood* **116**, 1932–1941 (2010). [Medline doi:10.1182/blood-2010-02-268508](#)
76. M. A. Connelly, D. L. Williams, SR-BI and cholesterol uptake into steroidogenic cells. *Trends Endocrinol. Metab.* **14**, 467–472 (2003). [Medline doi:10.1016/j.tem.2003.10.002](#)
